# Supplementary material for: Carbonyl migration from phosphorus to the metal in binuclear phosphaketenyl metal carbonyl complexes to give bridging diphosphido complexes
Source: Royal Society of Chemistry journal article supplement (doi:10.1039/c4nj01311e), 2014-12-04
Supplement: c4nj01311e1.pdf [file c4nj01311e1.pdf]

# Carbonyl Migration from Phosphorus to the Metal in Binuclear Phosphaketonyl Metal Carbonyl Complexes to Give Bridging Diphosphido Complexes

Wenjun Lü,<sup>a</sup> Chaoyang Wang,<sup>a</sup> Qiong Luo,<sup>\*a</sup> Qian-shu Li,<sup>a</sup> Yaoming Xie,<sup>b</sup>  
R. Bruce King,<sup>\*a,b</sup> and Henry F. Schaefer III<sup>b</sup>

<sup>a</sup>*MOE Key Laboratory of Theoretical Environmental Chemistry, Center for Computational Quantum Chemistry, South China Normal University, Guangzhou 510631, P. R. China*

<sup>b</sup>*Department of Chemistry and Center for Computational Chemistry, University of Georgia, Athens, Georgia 30602, USA*

## Supporting Information

**Tables S1 to S3.** Optimized coordinates of  $\text{Mn}_2(\text{CO})_8(\text{PCO})_2$ .

**Tables S4 to S11.** Optimized coordinates of  $\text{Mn}_2(\text{CO})_7(\text{PCO})_2$ .

**Tables S12 to S20.** Optimized coordinates of  $\text{Mn}_2(\text{CO})_6(\text{PCO})_2$ .

**Tables S21 to S24.** Optimized coordinates of  $\text{Mn}_2(\text{CO})_5(\text{PCO})_2$ .

**Tables S25 to S26.** Optimized coordinates of  $\text{Mn}(\text{CO})_5(\text{PCO})$ .

**Tables S27 to S28.** Optimized coordinates of  $\text{Mn}(\text{CO})_4(\text{PCO})$ .

**Tables S29 to S31.** Optimized coordinates of  $\text{Mn}(\text{CO})_3(\text{PCO})$ .

The units of atomic coordinates in Tables S1 to S31 are in Å.

**Tables S32 to S34.** Harmonic vibrational frequencies( $\text{cm}^{-1}$ ) and IR intensities (km/mol) of  $\text{Mn}_2(\text{CO})_8(\text{PCO})_2$ .

**Tables S35 to S42.** Harmonic vibrational frequencies( $\text{cm}^{-1}$ ) and IR intensities (km/mol) of  $\text{Mn}_2(\text{CO})_7(\text{PCO})_2$ .

**Tables S43 to S51.** Harmonic vibrational frequencies( $\text{cm}^{-1}$ ) and IR intensities (km/mol) of  $\text{Mn}_2(\text{CO})_6(\text{PCO})_2$ .

**Tables S52 to S55.** Harmonic vibrational frequencies( $\text{cm}^{-1}$ ) and IR intensities (km/mol) of  $\text{Mn}_2(\text{CO})_5(\text{PCO})_2$ .

**Tables S56 to S57.** Harmonic vibrational frequencies( $\text{cm}^{-1}$ ) and IR intensities (km/mol) of  $\text{Mn}(\text{CO})_5(\text{PCO})$ .

**Tables S58 to S59.** Harmonic vibrational frequencies( $\text{cm}^{-1}$ ) and IR intensities (km/mol) of  $\text{Mn}(\text{CO})_4(\text{PCO})$ .

**Table S60 to S62.** Harmonic vibrational frequencies( $\text{cm}^{-1}$ ) and IR intensities (km/mol) of  $\text{Mn}(\text{CO})_3(\text{PCO})$ .

**Complete Gaussian 09 reference (Reference 21)**

Table S1. Coordinates of Mn<sub>2</sub>(CO)<sub>8</sub>(PCO)<sub>2</sub> **28-1S(C<sub>2h</sub>)**.

|    | B3LYP     |           |           | BP86      |           |           |
|----|-----------|-----------|-----------|-----------|-----------|-----------|
| Mn | 0.000000  | 0.000000  | 1.933878  | 0.000000  | 0.000000  | 1.914742  |
| Mn | 0.000000  | 0.000000  | -1.933878 | 0.000000  | 0.000000  | -1.914742 |
| C  | -1.348197 | 2.343273  | 0.000000  | -1.342794 | 2.301075  | 0.000000  |
| C  | 1.348197  | -2.343273 | 0.000000  | 1.342794  | -2.301075 | 0.000000  |
| C  | 0.001445  | -1.340051 | -3.176134 | 0.000908  | -1.320205 | -3.151178 |
| C  | 1.867065  | -0.004238 | -1.875708 | 1.848906  | -0.007798 | -1.885450 |
| C  | -0.001445 | 1.340051  | -3.176134 | -0.000908 | 1.320205  | -3.151178 |
| C  | 1.867065  | -0.004238 | 1.875708  | 1.848906  | -0.007798 | 1.885450  |
| C  | 0.001445  | -1.340051 | 3.176134  | 0.000908  | -1.320205 | 3.151178  |
| C  | -1.867065 | 0.004238  | -1.875708 | -1.848906 | 0.007798  | -1.885450 |
| C  | -1.867065 | 0.004238  | 1.875708  | -1.848906 | 0.007798  | 1.885450  |
| C  | -0.001445 | 1.340051  | 3.176134  | -0.000908 | 1.320205  | 3.151178  |
| O  | 0.000000  | -2.191074 | -3.958435 | 0.000000  | -2.170323 | -3.957646 |
| O  | 3.020234  | -0.008560 | -1.864478 | 3.017200  | -0.010863 | -1.918363 |
| O  | 0.000000  | 2.191074  | -3.958435 | 0.000000  | 2.170323  | -3.957646 |
| O  | 3.020234  | -0.008560 | 1.864478  | 3.017200  | -0.010863 | 1.918363  |
| O  | 0.000000  | 2.191074  | 3.958435  | 0.000000  | 2.170323  | 3.957646  |
| O  | -3.020234 | 0.008560  | 1.864478  | -3.017200 | 0.010863  | 1.918363  |
| O  | 0.000000  | -2.191074 | 3.958435  | 0.000000  | -2.170323 | 3.957646  |
| O  | -3.020234 | 0.008560  | -1.864478 | -3.017200 | 0.010863  | -1.918363 |
| P  | 0.178082  | 1.620175  | 0.000000  | 0.199956  | 1.576881  | 0.000000  |
| O  | -2.354764 | 2.935268  | 0.000000  | -2.343871 | 2.924385  | 0.000000  |
| O  | 2.354764  | -2.935268 | 0.000000  | 2.343871  | -2.924385 | 0.000000  |
| P  | -0.178082 | -1.620175 | 0.000000  | -0.199956 | -1.576881 | 0.000000  |

Table S2. Coordinates of Mn<sub>2</sub>(CO)<sub>8</sub>(PCO)<sub>2</sub> **28-2S(C<sub>2v</sub>)**.

|    | B3LYP     |           |           | BP86      |           |           |
|----|-----------|-----------|-----------|-----------|-----------|-----------|
| Mn | 0.000000  | 1.930003  | 0.218737  | 0.000000  | 1.907237  | 0.220222  |
| Mn | 0.000000  | -1.930003 | 0.218737  | 0.000000  | -1.907237 | 0.220222  |
| C  | -2.382908 | 0.000000  | -1.062507 | -2.335657 | 0.000000  | -1.087561 |
| C  | 2.382908  | 0.000000  | -1.062507 | 2.335657  | 0.000000  | -1.087561 |
| C  | 1.339386  | 3.171840  | 0.175575  | 1.318173  | 3.144743  | 0.185224  |
| C  | 0.000000  | 1.794768  | -1.643852 | 0.000000  | 1.805076  | -1.625238 |
| C  | -1.339386 | 3.171840  | 0.175575  | -1.318173 | 3.144743  | 0.185224  |
| C  | 0.000000  | 1.950749  | 2.087348  | 0.000000  | 1.942609  | 2.070047  |
| C  | 1.339386  | -3.171840 | 0.175575  | 1.318173  | -3.144743 | 0.185224  |
| C  | 0.000000  | -1.950749 | 2.087348  | 0.000000  | -1.942609 | 2.070047  |
| C  | -1.339386 | -3.171840 | 0.175575  | -1.318173 | -3.144743 | 0.185224  |
| C  | 0.000000  | -1.794768 | -1.643852 | 0.000000  | -1.805076 | -1.625238 |
| O  | 0.000000  | 1.990461  | 3.239819  | 0.000000  | 2.015061  | 3.236460  |
| O  | 2.189664  | -3.954415 | 0.145083  | 2.166189  | -3.953067 | 0.159112  |
| O  | 0.000000  | -1.990461 | 3.239819  | 0.000000  | -2.015061 | 3.236460  |
| O  | -2.189664 | -3.954415 | 0.145083  | -2.166189 | -3.953067 | 0.159112  |
| O  | -2.189664 | 3.954415  | 0.145083  | -2.166189 | 3.953067  | 0.159112  |
| O  | 0.000000  | -1.739996 | -2.795803 | 0.000000  | -1.794607 | -2.794063 |
| O  | 0.000000  | 1.739996  | -2.795803 | 0.000000  | 1.794607  | -2.794063 |
| O  | 2.189664  | 3.954415  | 0.145083  | 2.166189  | 3.953067  | 0.159112  |
| P  | 1.625484  | 0.000000  | 0.446836  | 1.589530  | 0.000000  | 0.444350  |
| O  | 2.998408  | 0.000000  | -2.054655 | 2.975685  | 0.000000  | -2.077743 |
| P  | -1.625484 | 0.000000  | 0.446836  | -1.589530 | 0.000000  | 0.444350  |
| O  | -2.998408 | 0.000000  | -2.054655 | -2.975685 | 0.000000  | -2.077743 |

Table S3. Coordinates of Mn<sub>2</sub>(CO)<sub>8</sub>(PCO)<sub>2</sub> **28-3S(C<sub>1</sub>)**.

|    | B3LYP     |           |           | BP86      |           |           |
|----|-----------|-----------|-----------|-----------|-----------|-----------|
| Mn | -2.189350 | -0.028726 | 0.004160  | -2.147440 | -0.035030 | 0.008526  |
| Mn | 2.251303  | -0.172727 | -0.025159 | 2.212763  | -0.174362 | -0.040411 |
| C  | -0.015266 | -1.760365 | -1.070729 | -0.040409 | -1.592070 | -1.234749 |
| C  | 0.136993  | 2.280546  | 0.649738  | 0.124390  | 2.242629  | 0.649944  |
| C  | -2.915257 | 1.560319  | 0.508144  | -2.896750 | 1.470048  | 0.656496  |
| C  | -1.649119 | 0.630694  | -1.662402 | -1.670005 | 0.779140  | -1.585594 |
| C  | -3.782207 | -0.610766 | -0.667959 | -3.732389 | -0.562318 | -0.677357 |
| C  | -2.522231 | -0.796604 | 1.681393  | -2.450459 | -0.933871 | 1.600519  |
| C  | 3.196998  | 0.841740  | 1.159475  | 3.133013  | 0.656047  | 1.260562  |
| C  | 2.147759  | -1.574363 | 1.233777  | 2.055366  | -1.675308 | 1.051438  |
| C  | 3.764889  | -0.896517 | -0.769468 | 3.722147  | -0.854077 | -0.781145 |
| C  | 2.238147  | 1.229812  | -1.285318 | 2.340639  | 1.342126  | -1.110666 |
| O  | -2.729169 | -1.268326 | 2.712129  | -2.659773 | -1.493219 | 2.604166  |
| O  | 3.787298  | 1.485537  | 1.916331  | 3.737866  | 1.191404  | 2.110050  |
| O  | 2.122813  | -2.418775 | 2.013666  | 2.025544  | -2.602307 | 1.757629  |
| O  | 4.721465  | -1.344707 | -1.234019 | 4.709976  | -1.279145 | -1.242395 |
| O  | 1.041388  | -1.258566 | -1.394150 | 1.006896  | -1.042007 | -1.552774 |
| O  | -4.797012 | -0.963860 | -1.095117 | -4.771063 | -0.876798 | -1.119503 |
| O  | 2.249784  | 2.087685  | -2.050504 | 2.476897  | 2.293970  | -1.769362 |
| O  | -1.311255 | 1.038512  | -2.686151 | -1.387422 | 1.302154  | -2.590712 |
| O  | -3.400124 | 2.563701  | 0.821186  | -3.424998 | 2.434127  | 1.066614  |
| P  | -1.404440 | -2.450445 | -0.606064 | -1.406965 | -2.365656 | -0.780919 |
| P  | 0.063161  | 0.632079  | 0.991384  | 0.063998  | 0.582673  | 1.015302  |
| O  | 0.185579  | 3.439404  | 0.507290  | 0.160850  | 3.415002  | 0.524373  |

Table S4. Coordinates of Mn<sub>2</sub>(CO)<sub>7</sub>(PCO)<sub>2</sub> **27-1S(C<sub>s</sub>)**.

|    | B3LYP     |           |           | BP86      |           |           |
|----|-----------|-----------|-----------|-----------|-----------|-----------|
| Mn | -0.066768 | -2.375450 | 0.000000  | -0.068353 | -2.328141 | 0.000000  |
| Mn | -0.091553 | 2.346125  | 0.000000  | -0.090911 | 2.313851  | 0.000000  |
| C  | -1.827614 | -2.817678 | 0.000000  | -1.814809 | -2.779254 | 0.000000  |
| C  | -0.039564 | -2.339357 | 1.866154  | -0.066565 | -2.312341 | 1.849418  |
| C  | -0.039564 | -2.339357 | -1.866154 | -0.066565 | -2.312341 | -1.849418 |
| C  | 0.643802  | -4.050057 | 0.000000  | 0.654763  | -3.986324 | 0.000000  |
| C  | 1.235322  | 2.474059  | -1.324291 | 1.217783  | 2.464099  | -1.312141 |
| C  | -1.371787 | 1.980982  | -1.325485 | -1.357548 | 1.941645  | -1.310570 |
| C  | -1.371787 | 1.980982  | 1.325485  | -1.357548 | 1.941645  | 1.310570  |
| C  | -0.434742 | 4.155951  | 0.000000  | -0.455839 | 4.106009  | 0.000000  |
| C  | 1.235322  | 2.474059  | 1.324291  | 1.217783  | 2.464099  | 1.312141  |
| O  | 1.113169  | -5.110099 | 0.000000  | 1.130813  | -5.059144 | 0.000000  |
| O  | -0.028178 | -2.328865 | -3.022449 | -0.083885 | -2.330362 | -3.020393 |
| O  | -0.028178 | -2.328865 | 3.022449  | -0.083885 | -2.330362 | 3.020393  |
| O  | 2.048898  | 2.548994  | 2.132380  | 2.037590  | 2.567313  | 2.131942  |
| O  | -0.643907 | 5.290117  | 0.000000  | -0.681723 | 5.251949  | 0.000000  |
| O  | 2.048898  | 2.548994  | -2.132380 | 2.037590  | 2.567313  | -2.131942 |
| O  | -2.153363 | 1.743449  | -2.134114 | -2.152740 | 1.707619  | -2.127732 |
| O  | -2.952896 | -3.103443 | 0.000000  | -2.948976 | -3.090122 | 0.000000  |
| O  | -2.153363 | 1.743449  | 2.134114  | -2.152740 | 1.707619  | 2.127732  |
| P  | 0.388464  | -0.064149 | 0.000000  | 0.439445  | -0.066069 | 0.000000  |
| P  | 2.129739  | -1.030133 | 0.000000  | 2.182990  | -1.049983 | 0.000000  |

Table S5. Coordinates of Mn<sub>2</sub>(CO)<sub>7</sub>(PCO)<sub>2</sub> **27-2S(C<sub>s</sub>)**.

|    | B3LYP     |           |           | BP86      |           |           |
|----|-----------|-----------|-----------|-----------|-----------|-----------|
| Mn | 0.042236  | 2.897688  | 0.000000  | 0.034803  | 2.913897  | 0.000000  |
| Mn | -0.098066 | -2.708396 | 0.000000  | -0.087108 | -2.728485 | 0.000000  |
| C  | 1.020178  | 4.439121  | 0.000000  | 1.094606  | 4.384280  | 0.000000  |
| C  | 0.049515  | 2.898541  | 1.862201  | 0.031976  | 2.957218  | 1.846304  |
| C  | 0.049515  | 2.898541  | -1.862201 | 0.031976  | 2.957218  | -1.846304 |
| C  | -1.681970 | 3.499398  | 0.000000  | -1.659372 | 3.566533  | 0.000000  |
| C  | 0.977804  | -3.477610 | -1.326970 | 0.988177  | -3.477496 | -1.314459 |
| C  | 0.977804  | -3.477610 | 1.326970  | 0.988177  | -3.477496 | 1.314459  |
| C  | -1.007753 | -1.746785 | 1.326445  | -1.009371 | -1.799394 | 1.315857  |
| C  | -1.300395 | -4.093746 | 0.000000  | -1.254602 | -4.126324 | 0.000000  |
| C  | -1.007753 | -1.746785 | -1.326445 | -1.009371 | -1.799394 | -1.315857 |
| O  | -2.785846 | 3.850058  | 0.000000  | -2.763213 | 3.963359  | 0.000000  |
| O  | 0.049492  | 2.923052  | -3.017254 | 0.023506  | 3.023753  | -3.014384 |
| O  | 0.049492  | 2.923052  | 3.017254  | 0.023506  | 3.023753  | 3.014384  |
| O  | -1.566633 | -1.161020 | -2.144091 | -1.596138 | -1.231114 | -2.146682 |
| O  | -2.061255 | -4.962219 | 0.000000  | -2.008523 | -5.020208 | 0.000000  |
| O  | 1.644988  | -3.941899 | -2.141955 | 1.662168  | -3.950126 | -2.139707 |
| O  | 1.644988  | -3.941899 | 2.141955  | 1.662168  | -3.950126 | 2.139707  |
| O  | 1.666729  | 5.399674  | 0.000000  | 1.801896  | 5.319891  | 0.000000  |
| O  | -1.566633 | -1.161020 | 2.144091  | -1.596138 | -1.231114 | 2.146682  |
| P  | 0.757452  | 0.908992  | 0.000000  | 0.673753  | 0.905605  | 0.000000  |
| P  | 1.664647  | -0.863188 | 0.000000  | 1.620954  | -0.860989 | 0.000000  |

Table S6. Coordinates of Mn<sub>2</sub>(CO)<sub>7</sub>(PCO)<sub>2</sub> **27-3S(C<sub>s</sub>)**.

|    | B3LYP     |           |           | BP86      |           |           |
|----|-----------|-----------|-----------|-----------|-----------|-----------|
| Mn | 0.014006  | 0.207370  | 1.337007  | 0.021285  | 0.194364  | 1.320820  |
| Mn | 0.014006  | 0.207370  | -1.337007 | 0.021285  | 0.194364  | -1.320820 |
| C  | 1.759506  | -2.164572 | 0.000000  | 1.633508  | -2.200853 | 0.000000  |
| C  | -2.810242 | -0.799790 | 0.000000  | -2.830479 | -0.693337 | 0.000000  |
| C  | 1.598583  | -0.075582 | -2.194141 | 1.575764  | -0.135038 | -2.181795 |
| C  | -0.885229 | -0.677028 | -2.667369 | -0.887091 | -0.632418 | -2.654644 |
| C  | -0.885229 | -0.677028 | 2.667369  | -0.887091 | -0.632418 | 2.654644  |
| C  | -0.274346 | 1.807361  | 2.171071  | -0.195378 | 1.792616  | 2.142600  |
| C  | 1.164452  | 1.306926  | 0.000000  | 1.216610  | 1.221433  | 0.000000  |
| C  | 1.598583  | -0.075582 | 2.194141  | 1.575764  | -0.135038 | 2.181795  |
| C  | -0.274346 | 1.807361  | -2.171071 | -0.195378 | 1.792616  | -2.142600 |
| O  | -0.447744 | 2.805595  | 2.728032  | -0.321666 | 2.810780  | 2.709165  |
| O  | -1.450533 | -1.234529 | 3.505504  | -1.459229 | -1.157902 | 3.530192  |
| O  | 2.588642  | -0.248790 | 2.766805  | 2.566732  | -0.328219 | 2.777926  |
| O  | -1.450533 | -1.234529 | -3.505504 | -1.459229 | -1.157902 | -3.530192 |
| O  | 2.588642  | -0.248790 | -2.766805 | 2.566732  | -0.328219 | -2.777926 |
| O  | -0.447744 | 2.805595  | -2.728032 | -0.321666 | 2.810780  | -2.709165 |
| O  | 2.007075  | 2.110629  | 0.000000  | 2.111320  | 1.993973  | 0.000000  |
| P  | -2.010361 | 0.697770  | 0.000000  | -1.939574 | 0.771076  | 0.000000  |
| O  | -3.486276 | -1.748931 | 0.000000  | -3.596765 | -1.587844 | 0.000000  |
| P  | 0.084501  | -1.847416 | 0.000000  | -0.045829 | -1.827200 | 0.000000  |
| O  | 2.878122  | -2.485776 | 0.000000  | 2.748700  | -2.573159 | 0.000000  |

Table S7. Coordinates of Mn<sub>2</sub>(CO)<sub>7</sub>(PCO)<sub>2</sub> **27-4S(C<sub>2v</sub>)**.

|    | B3LYP     |           |           | BP86      |           |           |
|----|-----------|-----------|-----------|-----------|-----------|-----------|
| Mn | 0.000000  | 1.340925  | -0.043638 | 0.000000  | 1.324547  | -0.056577 |
| Mn | 0.000000  | -1.340925 | -0.043638 | 0.000000  | -1.324547 | -0.056577 |
| C  | 2.902231  | 0.000000  | -0.478775 | 2.859095  | 0.000000  | -0.454619 |
| C  | -2.902231 | 0.000000  | -0.478775 | -2.859095 | 0.000000  | -0.454619 |
| C  | 0.000000  | -2.686523 | -1.291172 | 0.000000  | -2.668792 | -1.274720 |
| C  | -1.328774 | -2.178167 | 0.881920  | -1.307426 | -2.161612 | 0.865759  |
| C  | 1.328774  | -2.178167 | 0.881920  | 1.307426  | -2.161612 | 0.865759  |
| C  | 0.000000  | 0.000000  | 1.540534  | 0.000000  | 0.000000  | 1.511259  |
| C  | -1.328774 | 2.178167  | 0.881920  | -1.307426 | 2.161612  | 0.865759  |
| C  | 1.328774  | 2.178167  | 0.881920  | 1.307426  | 2.161612  | 0.865759  |
| C  | 0.000000  | 2.686523  | -1.291172 | 0.000000  | 2.668792  | -1.274720 |
| O  | 2.154771  | 2.738978  | 1.466340  | 2.127758  | 2.744304  | 1.468153  |
| O  | 2.154771  | -2.738978 | 1.466340  | 2.127758  | -2.744304 | 1.468153  |
| O  | 0.000000  | 0.000000  | 2.705176  | 0.000000  | 0.000000  | 2.693742  |
| O  | -2.154771 | -2.738978 | 1.466340  | -2.127758 | -2.744304 | 1.468153  |
| O  | 0.000000  | -3.534653 | -2.073771 | 0.000000  | -3.550931 | -2.043543 |
| O  | -2.154771 | 2.738978  | 1.466340  | -2.127758 | 2.744304  | 1.468153  |
| O  | 0.000000  | 3.534653  | -2.073771 | 0.000000  | 3.550931  | -2.043543 |
| P  | -1.521567 | 0.000000  | -1.471184 | -1.484430 | 0.000000  | -1.479859 |
| O  | -3.906460 | 0.000000  | 0.110219  | -3.871480 | 0.000000  | 0.143549  |
| P  | 1.521567  | 0.000000  | -1.471184 | 1.484430  | 0.000000  | -1.479859 |
| O  | 3.906460  | 0.000000  | 0.110219  | 3.871480  | 0.000000  | 0.143549  |



Table S8. Coordinates of Mn<sub>2</sub>(CO)<sub>7</sub>(PCO)<sub>2</sub> **27-5S(C<sub>1</sub>)**.

|    | B3LYP     |           |           | BP86      |           |           |
|----|-----------|-----------|-----------|-----------|-----------|-----------|
| Mn | -1.837890 | -0.045903 | 0.086506  | -1.826956 | -0.034278 | 0.092727  |
| C  | 0.345171  | -2.531150 | -0.930457 | 0.336909  | -2.501817 | -0.994999 |
| C  | 0.007294  | 2.709707  | -0.349977 | 0.058298  | 2.648170  | -0.402980 |
| C  | 3.156712  | 1.506549  | 0.313691  | 3.142659  | 1.474410  | 0.310350  |
| C  | 3.233477  | -0.836741 | -0.960050 | 3.212314  | -0.846844 | -0.906293 |
| C  | -2.235503 | 0.987563  | -1.418177 | -2.251513 | 0.989779  | -1.386608 |
| C  | -3.063508 | 0.871701  | 1.088069  | -3.032486 | 0.873434  | 1.093786  |
| C  | 2.278231  | -0.681251 | 1.420190  | 2.263916  | -0.658923 | 1.395160  |
| C  | -1.332132 | -1.089053 | 1.553320  | -1.348896 | -1.084808 | 1.540677  |
| C  | -3.015891 | -1.333567 | -0.448645 | -3.010373 | -1.296130 | -0.429758 |
| O  | 3.901240  | 2.349825  | 0.585776  | 3.920198  | 2.308095  | 0.592248  |
| O  | 4.034674  | -1.483939 | -1.488513 | 4.043789  | -1.512107 | -1.402564 |
| O  | -2.502010 | 1.618775  | -2.345499 | -2.564388 | 1.622553  | -2.317718 |
| O  | -3.757135 | -2.150387 | -0.795581 | -3.781251 | -2.110325 | -0.770980 |
| O  | -1.047532 | -1.748777 | 2.454839  | -1.100071 | -1.768825 | 2.453913  |
| O  | -3.831597 | 1.453446  | 1.725979  | -3.813492 | 1.455632  | 1.743977  |
| O  | 2.453656  | -1.250945 | 2.414343  | 2.466909  | -1.228161 | 2.405439  |
| P  | 0.101334  | -0.884365 | -1.220811 | 0.100312  | -0.821974 | -1.167495 |
| O  | 0.517492  | -3.675587 | -0.785625 | 0.511428  | -3.664892 | -0.939410 |
| O  | -0.011316 | 3.620605  | -1.082609 | 0.084727  | 3.558357  | -1.155065 |
| P  | 0.048848  | 1.490229  | 0.812061  | 0.054420  | 1.455235  | 0.807136  |
| Mn | 1.975666  | 0.182917  | -0.124163 | 1.959406  | 0.179671  | -0.124301 |

Table S9. Coordinates of Mn<sub>2</sub>(CO)<sub>7</sub>(PCO)<sub>2</sub> **27-6S(C<sub>s</sub>)**.

|    | B3LYP     |           |           | BP86      |           |           |
|----|-----------|-----------|-----------|-----------|-----------|-----------|
| Mn | -0.461522 | 1.927839  | 0.000000  | -0.464098 | 1.891264  | 0.000000  |
| Mn | -0.106695 | -1.840763 | 0.000000  | -0.097315 | -1.821695 | 0.000000  |
| C  | 0.434519  | 0.285981  | 2.592509  | 0.401220  | 0.317315  | 2.564546  |
| C  | 0.434519  | 0.285981  | -2.592509 | 0.401220  | 0.317315  | -2.564546 |
| C  | -0.683350 | 3.151240  | -1.330726 | -0.673948 | 3.109728  | -1.305497 |
| C  | -1.899158 | -2.372727 | 0.000000  | -1.849566 | -2.412860 | 0.000000  |
| C  | -0.683350 | 3.151240  | 1.330726  | -0.673948 | 3.109728  | 1.305497  |
| C  | 0.269932  | -3.017154 | 1.345164  | 0.299727  | -2.982926 | 1.326846  |
| C  | 1.310392  | 2.207906  | 0.000000  | 1.268175  | 2.208740  | 0.000000  |
| C  | 1.656569  | -1.215090 | 0.000000  | 1.645669  | -1.192832 | 0.000000  |
| C  | 0.269932  | -3.017154 | -1.345164 | 0.299727  | -2.982926 | -1.326846 |
| O  | -2.997904 | -2.721410 | 0.000000  | -2.942275 | -2.826300 | 0.000000  |
| O  | -0.829468 | 3.924788  | -2.179658 | -0.813511 | 3.913619  | -2.150888 |
| O  | 2.755538  | -0.867857 | 0.000000  | 2.765694  | -0.863051 | 0.000000  |
| O  | 2.456540  | 2.380531  | 0.000000  | 2.424391  | 2.430141  | 0.000000  |
| O  | 0.509997  | -3.756574 | 2.200975  | 0.560729  | -3.739834 | 2.182660  |
| O  | -0.829468 | 3.924788  | 2.179658  | -0.813511 | 3.913619  | 2.150888  |
| O  | 0.509997  | -3.756574 | -2.200975 | 0.560729  | -3.739834 | -2.182660 |
| P  | -0.850016 | 0.020599  | -1.533111 | -0.876879 | 0.009594  | -1.487880 |
| O  | 1.277750  | 0.463891  | -3.379343 | 1.230878  | 0.519898  | -3.376261 |
| P  | -0.850016 | 0.020599  | 1.533111  | -0.876879 | 0.009594  | 1.487880  |
| O  | 1.277750  | 0.463891  | 3.379343  | 1.230878  | 0.519898  | 3.376261  |

Table S10. Coordinates of Mn<sub>2</sub>(CO)<sub>7</sub>(PCO)<sub>2</sub> **27-7S(C<sub>s</sub>)**.

|    | B3LYP     |           |           | BP86      |           |           |
|----|-----------|-----------|-----------|-----------|-----------|-----------|
| Mn | -0.188946 | -1.462243 | 0.000000  | -0.174229 | -1.410694 | 0.000000  |
| Mn | -0.307597 | 1.588158  | 0.000000  | -0.314161 | 1.504563  | 0.000000  |
| C  | 1.174323  | 0.299640  | 2.477081  | 1.168791  | 0.320475  | 2.452838  |
| C  | 1.174323  | 0.299640  | -2.477081 | 1.168791  | 0.320475  | -2.452838 |
| C  | -0.411719 | 3.386174  | 0.000000  | -0.446744 | 3.281698  | 0.000000  |
| C  | 1.677821  | -1.353644 | 0.000000  | 1.672493  | -1.284255 | 0.000000  |
| C  | 1.530917  | 1.848518  | 0.000000  | 1.496708  | 1.835138  | 0.000000  |
| C  | -0.141132 | -2.712379 | 1.327219  | -0.100505 | -2.659128 | 1.308398  |
| C  | -2.160808 | 1.660334  | 0.000000  | -2.145184 | 1.607450  | 0.000000  |
| C  | -2.062328 | -1.517262 | 0.000000  | -2.026531 | -1.523336 | 0.000000  |
| C  | -0.141132 | -2.712379 | -1.327219 | -0.100505 | -2.659128 | -1.308398 |
| O  | -3.306972 | 1.822648  | 0.000000  | -3.303260 | 1.808512  | 0.000000  |
| O  | -0.476961 | 4.545505  | 0.000000  | -0.539023 | 4.455713  | 0.000000  |
| O  | -3.210669 | -1.605344 | 0.000000  | -3.184286 | -1.669141 | 0.000000  |
| O  | -0.107726 | -3.518470 | 2.154308  | -0.048829 | -3.494347 | 2.126884  |
| O  | -0.107726 | -3.518470 | -2.154308 | -0.048829 | -3.494347 | -2.126884 |
| O  | 2.658566  | 2.109520  | 0.000000  | 2.621296  | 2.174380  | 0.000000  |
| O  | 2.830202  | -1.339563 | 0.000000  | 2.840567  | -1.284877 | 0.000000  |
| P  | -0.444301 | 0.281091  | -1.933300 | -0.470908 | 0.259313  | -1.909754 |
| O  | 2.229455  | 0.328808  | -2.967993 | 2.219500  | 0.404400  | -2.973979 |
| P  | -0.444301 | 0.281091  | 1.933300  | -0.470908 | 0.259313  | 1.909754  |
| O  | 2.229455  | 0.328808  | 2.967993  | 2.219500  | 0.404400  | 2.973979  |

Table S11. Coordinates of Mn<sub>2</sub>(CO)<sub>7</sub>(PCO)<sub>2</sub> **27-8S(C<sub>s</sub>)**.

|    | B3LYP     |           |           | BP86      |           |           |
|----|-----------|-----------|-----------|-----------|-----------|-----------|
| Mn | 0.000000  | 0.000000  | -1.448070 | 0.000000  | 0.000000  | -1.395469 |
| C  | -0.495681 | 2.811756  | 0.224897  | 0.000000  | 2.834396  | 0.230861  |
| C  | 0.495681  | -2.811756 | 0.224897  | 0.000000  | -2.834396 | 0.230861  |
| C  | -1.411054 | -1.193229 | 1.772848  | -1.577546 | -0.915444 | 1.743273  |
| C  | 0.000000  | 0.000000  | 3.408159  | 0.000000  | 0.000000  | 3.306922  |
| C  | -1.456468 | -1.176237 | -1.421944 | -1.608730 | -0.920172 | -1.383908 |
| C  | 0.838620  | -1.029125 | -2.698894 | 0.658106  | -1.130204 | -2.647041 |
| C  | 1.411054  | 1.193229  | 1.772848  | 1.577546  | 0.915444  | 1.743273  |
| C  | 1.456468  | 1.176237  | -1.421944 | 1.608730  | 0.920172  | -1.383908 |
| C  | -0.838620 | 1.029125  | -2.698894 | -0.658106 | 1.130204  | -2.647041 |
| O  | -2.273170 | -1.936314 | 1.983825  | -2.563492 | -1.493861 | 2.015544  |
| O  | 0.000000  | 0.000000  | 4.569318  | 0.000000  | 0.000000  | 4.484541  |
| O  | -2.354461 | -1.896925 | -1.458423 | -2.624966 | -1.490790 | -1.451138 |
| O  | -1.361079 | 1.670929  | -3.505194 | -1.070603 | 1.836631  | -3.484266 |
| O  | 2.354461  | 1.896925  | -1.458423 | 2.624966  | 1.490790  | -1.451138 |
| O  | 1.361079  | -1.670929 | -3.505194 | 1.070603  | -1.836631 | -3.484266 |
| O  | 2.273170  | 1.936314  | 1.983825  | 2.563492  | 1.493861  | 2.015544  |
| P  | -1.387898 | 1.357963  | 0.306170  | -1.146923 | 1.542480  | 0.289960  |
| O  | 0.000000  | 3.864428  | 0.186977  | 0.651728  | 3.813007  | 0.234517  |
| O  | 0.000000  | -3.864428 | 0.186977  | -0.651728 | -3.813007 | 0.234517  |
| P  | 1.387898  | -1.357963 | 0.306170  | 1.146923  | -1.542480 | 0.289960  |
| Mn | 0.000000  | 0.000000  | 1.607012  | 0.000000  | 0.000000  | 1.524695  |

Table S12. Coordinates of Mn<sub>2</sub>(CO)<sub>6</sub>(PCO)<sub>2</sub> **26-1S(C<sub>2</sub>)**.

|    | B3LYP     |           |           | BP86      |           |           |
|----|-----------|-----------|-----------|-----------|-----------|-----------|
| Mn | 0.001786  | 1.404295  | -0.026992 | -0.002556 | 1.382145  | -0.033976 |
| Mn | -0.001786 | -1.404295 | -0.026992 | 0.002556  | -1.382145 | -0.033976 |
| C  | -0.615279 | 3.026808  | -0.533547 | -0.583168 | 2.995254  | -0.584946 |
| C  | 1.693122  | 2.000125  | -0.502116 | 1.687959  | 1.984741  | -0.445264 |
| C  | 0.551931  | 1.659639  | 1.701439  | 0.523529  | 1.619616  | 1.691822  |
| C  | 1.677098  | -1.045151 | 0.699038  | 1.687959  | -1.090773 | 0.670423  |
| C  | 0.615279  | -3.026808 | -0.533547 | 0.583168  | -2.995254 | -0.584946 |
| C  | -0.551931 | -1.659639 | 1.701439  | -0.523529 | -1.619616 | 1.691822  |
| C  | -1.693122 | -2.000125 | -0.502116 | -1.687959 | -1.984741 | -0.445264 |
| C  | -1.677098 | 1.045151  | 0.699038  | -1.687959 | 1.090773  | 0.670423  |
| O  | -2.722692 | 0.932719  | 1.179732  | -2.751770 | 1.013972  | 1.151118  |
| O  | 0.879193  | 1.832202  | 2.797022  | 0.841160  | 1.791273  | 2.805727  |
| O  | -1.022136 | 4.063136  | -0.849992 | -0.970035 | 4.047175  | -0.928600 |
| O  | 2.722692  | 2.489956  | -0.704189 | 2.732727  | 2.491646  | -0.612157 |
| O  | 1.022136  | -4.063136 | -0.849992 | 0.970035  | -4.047175 | -0.928600 |
| O  | -2.722692 | -2.489956 | -0.704189 | -2.732727 | -2.491646 | -0.612157 |
| O  | -0.879193 | -1.832202 | 2.797022  | -0.841160 | -1.791273 | 2.805727  |
| O  | 2.722692  | -0.932719 | 1.179732  | 2.751770  | -1.013972 | 1.151118  |
| P  | -1.004099 | 0.173477  | -1.792977 | -1.027209 | 0.114332  | -1.764769 |
| P  | 1.004099  | -0.173477 | -1.792977 | 1.027209  | -0.114332 | -1.764769 |

Table S13. Coordinates of Mn<sub>2</sub>(CO)<sub>6</sub>(PCO)<sub>2</sub> **26-2S(C<sub>s</sub>)**.

|    | B3LYP     |           |           | BP86      |           |           |
|----|-----------|-----------|-----------|-----------|-----------|-----------|
| Mn | 0.092223  | -1.384553 | 0.000000  | 0.104657  | -1.361228 | 0.000000  |
| Mn | -0.069508 | 1.441656  | 0.000000  | -0.055990 | 1.416178  | 0.000000  |
| C  | -1.395121 | -2.461492 | 0.000000  | -1.395271 | -2.393644 | 0.000000  |
| C  | -0.061111 | -1.419743 | 1.866821  | -0.063699 | -1.399631 | 1.847667  |
| C  | 1.272727  | -2.769543 | 0.000000  | 1.235057  | -2.763311 | 0.000000  |
| C  | 0.932023  | 2.993706  | 0.000000  | 0.888857  | 2.982701  | 0.000000  |
| C  | -0.794732 | 2.090321  | 1.546492  | -0.731784 | 2.050611  | 1.566719  |
| C  | -0.794732 | 2.090321  | -1.546492 | -0.731784 | 2.050611  | -1.566719 |
| C  | -1.624546 | 0.398675  | 0.000000  | -1.647947 | 0.449955  | 0.000000  |
| C  | -0.061111 | -1.419743 | -1.866821 | -0.063699 | -1.399631 | -1.847667 |
| O  | -0.259881 | -1.539558 | -2.997388 | -0.276309 | -1.533806 | -2.990397 |
| O  | 2.031460  | -3.638368 | 0.000000  | 1.968316  | -3.674656 | 0.000000  |
| O  | -2.314043 | -3.155554 | 0.000000  | -2.338109 | -3.081189 | 0.000000  |
| O  | -0.259881 | -1.539558 | 2.997388  | -0.276309 | -1.533806 | 2.990397  |
| O  | -1.246808 | 2.523905  | 2.521082  | -1.165573 | 2.491830  | 2.562715  |
| O  | -2.768057 | 0.156891  | 0.000000  | -2.806132 | 0.220780  | 0.000000  |
| O  | -1.246808 | 2.523905  | -2.521082 | -1.165573 | 2.491830  | -2.562715 |
| O  | 1.521117  | 3.987474  | 0.000000  | 1.438008  | 4.016152  | 0.000000  |
| P  | 1.697831  | 0.233478  | -1.037087 | 1.693947  | 0.199440  | -1.050313 |
| P  | 1.697831  | 0.233478  | 1.037087  | 1.693947  | 0.199440  | 1.050313  |

Table S14. Coordinates of Mn<sub>2</sub>(CO)<sub>6</sub>(PCO)<sub>2</sub> **26-3S(C<sub>s</sub>)**.

|    | B3LYP     |           |           | BP86      |           |           |
|----|-----------|-----------|-----------|-----------|-----------|-----------|
| Mn | -0.005413 | -0.060593 | 2.201585  | -0.005407 | -0.060594 | 2.201584  |
| Mn | -0.005413 | -0.060593 | -2.201585 | -0.005407 | -0.060594 | -2.201584 |
| C  | 0.335547  | -1.334366 | 3.452708  | 0.335548  | -1.334362 | 3.452712  |
| C  | -1.849395 | -0.183798 | 2.566754  | -1.849388 | -0.183805 | 2.566746  |
| C  | 0.148428  | 1.379373  | 3.312923  | 0.148406  | 1.379376  | 3.312920  |
| C  | -1.849395 | -0.183798 | -2.566754 | -1.849388 | -0.183805 | -2.566746 |
| C  | 0.335547  | -1.334366 | -3.452708 | 0.335548  | -1.334362 | -3.452712 |
| C  | 0.148428  | 1.379373  | -3.312923 | 0.148406  | 1.379376  | -3.312920 |
| C  | 1.820345  | 0.025988  | -1.814837 | 1.820336  | 0.026029  | -1.814845 |
| C  | 1.820345  | 0.025988  | 1.814837  | 1.820336  | 0.026029  | 1.814845  |
| O  | 2.955208  | 0.075859  | 1.616798  | 2.955223  | 0.075862  | 1.616801  |
| O  | 0.233921  | 2.308702  | 3.995545  | 0.233876  | 2.308707  | 3.995542  |
| O  | 0.550764  | -2.156429 | 4.238910  | 0.550764  | -2.156425 | 4.238916  |
| O  | -2.969595 | -0.261342 | 2.824065  | -2.969586 | -0.261362 | 2.824054  |
| O  | 0.550764  | -2.156429 | -4.238910 | 0.550764  | -2.156425 | -4.238916 |
| O  | 2.955208  | 0.075859  | -1.616798 | 2.955223  | 0.075862  | -1.616801 |
| O  | 0.233921  | 2.308702  | -3.995545 | 0.233876  | 2.308707  | -3.995542 |
| O  | -2.969595 | -0.261342 | -2.824065 | -2.969586 | -0.261362 | -2.824054 |
| P  | -0.733429 | 1.170580  | 0.000000  | -0.733433 | 1.170567  | 0.000000  |
| P  | -0.434118 | -0.842939 | 0.000000  | -0.434097 | -0.842947 | 0.000000  |

Table S15. Coordinates of Mn<sub>2</sub>(CO)<sub>6</sub>(PCO)<sub>2</sub> **26-1T**(C<sub>2v</sub>).

|    | B3LYP     |           |           | BP86      |           |           |
|----|-----------|-----------|-----------|-----------|-----------|-----------|
| Mn | 0.000000  | 2.056960  | 0.038497  | 0.000000  | 2.042381  | -0.050676 |
| Mn | 0.000000  | -2.056960 | 0.038497  | 0.000000  | -2.042381 | -0.050676 |
| C  | 1.420342  | 3.179757  | -0.252519 | -1.420811 | 3.137123  | 0.254628  |
| C  | 0.000000  | 2.578056  | 1.848871  | 0.000000  | 2.647500  | -1.812730 |
| C  | -1.420342 | 3.179757  | -0.252519 | 1.420811  | 3.137123  | 0.254628  |
| C  | 0.000000  | -2.578056 | 1.848871  | 0.000000  | -2.647500 | -1.812730 |
| C  | 1.420342  | -3.179757 | -0.252519 | -1.420811 | -3.137123 | 0.254628  |
| C  | -1.420342 | -3.179757 | -0.252519 | 1.420811  | -3.137123 | 0.254628  |
| C  | 0.000000  | -1.676689 | -1.791336 | 0.000000  | -1.686415 | 1.767585  |
| C  | 0.000000  | 1.676689  | -1.791336 | 0.000000  | 1.686415  | 1.767585  |
| O  | 0.000000  | 1.527740  | -2.935021 | 0.000000  | 1.566741  | 2.929418  |
| O  | -2.334871 | 3.863506  | -0.434459 | 2.346359  | 3.826629  | 0.455233  |
| O  | 2.334871  | 3.863506  | -0.434459 | -2.346359 | 3.826629  | 0.455233  |
| O  | 0.000000  | 2.933512  | 2.944618  | 0.000000  | 3.090106  | -2.892831 |
| O  | 2.334871  | -3.863506 | -0.434459 | -2.346359 | -3.826629 | 0.455233  |
| O  | 0.000000  | -1.527740 | -2.935021 | 0.000000  | -1.566741 | 2.929418  |
| O  | -2.334871 | -3.863506 | -0.434459 | 2.346359  | -3.826629 | 0.455233  |
| O  | 0.000000  | -2.933512 | 2.944618  | 0.000000  | -3.090106 | -2.892831 |
| P  | -1.102738 | 0.000000  | 0.573145  | 1.095096  | 0.000000  | -0.606279 |
| P  | 1.102738  | 0.000000  | 0.573145  | -1.095096 | 0.000000  | -0.606279 |



Table S16. Coordinates of Mn<sub>2</sub>(CO)<sub>6</sub>(PCO)<sub>2</sub> **26-4S(C<sub>2</sub>)**.

|    | B3LYP     |           |           | BP86      |           |           |
|----|-----------|-----------|-----------|-----------|-----------|-----------|
| Mn | -0.183500 | 3.057074  | 0.000000  | 0.692287  | -2.951528 | 0.000000  |
| Mn | 0.183500  | -3.057074 | 0.000000  | -0.692287 | 2.951528  | 0.000000  |
| C  | -0.044274 | 4.217292  | 1.403647  | 0.701153  | -4.097572 | 1.403903  |
| C  | -2.044540 | 3.255007  | 0.000000  | 2.548223  | -2.938802 | 0.000000  |
| C  | -0.044274 | 4.217292  | -1.403647 | 0.701153  | -4.097572 | -1.403903 |
| C  | -1.666253 | -2.830936 | 0.000000  | 1.150869  | 3.005937  | 0.000000  |
| C  | 0.044274  | -4.217292 | 1.403647  | -0.701153 | 4.097572  | 1.403903  |
| C  | 0.044274  | -4.217292 | -1.403647 | -0.701153 | 4.097572  | -1.403903 |
| C  | 2.044540  | -3.255007 | 0.000000  | -2.548223 | 2.938802  | 0.000000  |
| C  | 1.666253  | 2.830936  | 0.000000  | -1.150869 | -3.005937 | 0.000000  |
| O  | 2.814161  | 2.715889  | 0.000000  | -2.317347 | -3.079870 | 0.000000  |
| O  | 0.044274  | 4.926523  | -2.312960 | 0.701153  | -4.815506 | -2.329986 |
| O  | 0.044274  | 4.926523  | 2.312960  | 0.701153  | -4.815506 | 2.329986  |
| O  | -3.187580 | 3.409652  | 0.000000  | 3.715770  | -2.982266 | 0.000000  |
| O  | -0.044274 | -4.926523 | 2.312960  | -0.701153 | 4.815506  | 2.329986  |
| O  | 3.187580  | -3.409652 | 0.000000  | -3.715770 | 2.982266  | 0.000000  |
| O  | -0.044274 | -4.926523 | -2.312960 | -0.701153 | 4.815506  | -2.329986 |
| O  | -2.814161 | -2.715889 | 0.000000  | 2.317347  | 3.079870  | 0.000000  |
| P  | -0.396022 | 0.910575  | 0.000000  | 0.600902  | -0.806782 | 0.000000  |
| P  | 0.396022  | -0.910575 | 0.000000  | -0.600902 | 0.806782  | 0.000000  |

Table S17. Coordinates of Mn<sub>2</sub>(CO)<sub>6</sub>(PCO)<sub>2</sub> **26-2T(C<sub>2</sub>)**.

|    | B3LYP     |           |           | BP86      |           |           |
|----|-----------|-----------|-----------|-----------|-----------|-----------|
| Mn | 0.040854  | 2.039444  | 0.059919  | -0.014312 | 2.011892  | 0.061048  |
| Mn | -0.040854 | -2.039444 | 0.059919  | 0.014312  | -2.011892 | 0.061048  |
| C  | 0.777874  | 3.650698  | -0.442965 | 0.587708  | 3.646210  | -0.473058 |
| C  | -0.469164 | 2.815320  | 1.692728  | -0.460667 | 2.772934  | 1.695681  |
| C  | -1.624054 | 2.278926  | -0.687181 | -1.692953 | 2.174679  | -0.628643 |
| C  | -0.783985 | -1.320588 | -1.494022 | -0.736355 | -1.339312 | -1.490304 |
| C  | -0.777874 | -3.650698 | -0.442965 | -0.587708 | -3.646210 | -0.473058 |
| C  | 1.624054  | -2.278926 | -0.687181 | 1.692953  | -2.174679 | -0.628643 |
| C  | 0.469164  | -2.815320 | 1.692728  | 0.460667  | -2.772934 | 1.695681  |
| C  | 0.783985  | 1.320588  | -1.494022 | 0.736355  | 1.339312  | -1.490304 |
| O  | 1.287887  | 0.954568  | -2.466064 | 1.257190  | 1.009121  | -2.483977 |
| O  | -2.657938 | 2.460666  | -1.173811 | -2.758602 | 2.318491  | -1.093725 |
| O  | 1.221707  | 4.668498  | -0.765261 | 0.946895  | 4.704680  | -0.824336 |
| O  | -0.783985 | 3.313962  | 2.683824  | -0.736355 | 3.287391  | 2.708074  |
| O  | -1.221707 | -4.668498 | -0.765261 | -0.946895 | -4.704680 | -0.824336 |
| O  | 0.783985  | -3.313962 | 2.683824  | 0.736355  | -3.287391 | 2.708074  |
| O  | 2.657938  | -2.460666 | -1.173811 | 2.758602  | -2.318491 | -1.093725 |
| O  | -1.287887 | -0.954568 | -2.466064 | -1.257190 | -1.009121 | -2.483977 |
| P  | 1.009608  | 0.084015  | 1.190744  | 1.020850  | 0.116075  | 1.160230  |
| P  | -1.009608 | -0.084015 | 1.190744  | -1.020850 | -0.116075 | 1.160230  |

Table S18. Coordinates of Mn<sub>2</sub>(CO)<sub>6</sub>(PCO)<sub>2</sub> **26-5S(C<sub>2</sub>)**.

|    | B3LYP     |           |           | BP86      |           |           |
|----|-----------|-----------|-----------|-----------|-----------|-----------|
| Mn | 0.000000  | 0.000000  | -1.334545 | 0.000000  | 0.000000  | -1.297915 |
| Mn | 0.000000  | 0.000000  | 1.481495  | 0.000000  | 0.000000  | 1.462479  |
| C  | 2.042240  | 0.441523  | -1.236642 | 1.978998  | 0.264691  | -1.324573 |
| C  | -2.042240 | -0.441523 | -1.236642 | -1.978998 | -0.264691 | -1.324573 |
| C  | 0.000000  | -1.275667 | -2.617564 | 0.000000  | -1.293077 | -2.555676 |
| C  | 0.000000  | 1.275667  | -2.617564 | 0.000000  | 1.293077  | -2.555676 |
| C  | 0.792298  | 1.696716  | 1.407332  | 0.966882  | 1.581351  | 1.375056  |
| C  | -1.187859 | 0.562035  | 2.754989  | -1.080375 | 0.713125  | 2.744183  |
| C  | -0.792298 | -1.696716 | 1.407332  | -0.966882 | -1.581351 | 1.375056  |
| C  | 1.187859  | -0.562035 | 2.754989  | 1.080375  | -0.713125 | 2.744183  |
| P  | -1.686111 | 0.889635  | -0.120430 | -1.589489 | 1.027980  | -0.068403 |
| P  | 1.686111  | -0.889635 | -0.120430 | 1.589489  | -1.027980 | -0.068403 |
| O  | -1.915504 | 0.914039  | 3.580404  | -1.744521 | 1.164718  | 3.594715  |
| O  | -0.028963 | -2.108402 | -3.418226 | -0.059496 | -2.137012 | -3.364239 |
| O  | -1.280444 | -2.739927 | 1.386133  | -1.570890 | -2.579782 | 1.355025  |
| O  | 1.915504  | -0.914039 | 3.580404  | 1.744521  | -1.164718 | 3.594715  |
| O  | 1.280444  | 2.739927  | 1.386133  | 1.570890  | 2.579782  | 1.355025  |
| O  | -2.810217 | -1.159844 | -1.783202 | -2.878354 | -0.814892 | -1.893619 |
| O  | 0.028963  | 2.108402  | -3.418226 | 0.059496  | 2.137012  | -3.364239 |
| O  | 2.810217  | 1.159844  | -1.783202 | 2.878354  | 0.814892  | -1.893619 |

Table S19. Coordinates of Mn<sub>2</sub>(CO)<sub>6</sub>(PCO)<sub>2</sub> **26-6S(C<sub>1</sub>)**.

|    | B3LYP     |           |           | BP86      |           |           |
|----|-----------|-----------|-----------|-----------|-----------|-----------|
| Mn | -1.383611 | -0.339639 | -0.246818 | -1.325258 | -0.291610 | -0.119038 |
| Mn | 1.408790  | -0.113199 | -0.011116 | 1.378223  | -0.106796 | -0.010824 |
| C  | -0.363454 | 2.531689  | -0.724378 | -0.292402 | 2.490673  | -0.738394 |
| C  | -1.469456 | -0.871708 | 1.756472  | -1.806225 | -0.469673 | 1.702530  |
| C  | 2.559814  | -1.076902 | 1.033640  | 2.565673  | -1.023535 | 1.016635  |
| C  | 2.746120  | 0.977874  | -0.614998 | 2.738317  | 0.799042  | -0.813417 |
| C  | 1.025897  | 1.019764  | 1.428592  | 1.170532  | 1.151223  | 1.337306  |
| C  | 1.642628  | -1.308042 | -1.433773 | 1.396522  | -1.483363 | -1.255193 |
| C  | -2.744319 | 0.765045  | 0.211473  | -2.812091 | 0.737388  | -0.237356 |
| C  | -2.540359 | -1.231375 | -1.280879 | -2.213568 | -1.507387 | -1.060336 |
| O  | 0.827735  | 1.714911  | 2.326539  | 1.087766  | 1.921838  | 2.211405  |
| O  | 3.601532  | 1.661162  | -0.983362 | 3.629516  | 1.371669  | -1.309994 |
| O  | 3.320300  | -1.658130 | 1.680884  | 3.374778  | -1.585521 | 1.648122  |
| O  | -2.094709 | -0.581072 | 2.720206  | -2.545938 | -0.290068 | 2.624941  |
| O  | 1.807648  | -2.050109 | -2.300026 | 1.442818  | -2.366033 | -2.017776 |
| O  | -3.265072 | -1.837420 | -1.955663 | -2.791743 | -2.339496 | -1.660071 |
| O  | -3.616855 | 1.454837  | 0.533296  | -3.792980 | 1.378925  | -0.281316 |
| O  | -0.534607 | 3.569692  | -0.227041 | -0.458702 | 3.563725  | -0.288012 |
| P  | -0.144901 | 1.090650  | -1.602775 | -0.134204 | 1.006310  | -1.601693 |
| P  | -0.264330 | -1.871189 | 0.924962  | -0.223715 | -1.502734 | 1.342861  |

Table S20. Coordinates of Mn<sub>2</sub>(CO)<sub>6</sub>(PCO)<sub>2</sub> **26-7S(C<sub>s</sub>)**.

|    | B3LYP     |           |           | BP86      |           |           |
|----|-----------|-----------|-----------|-----------|-----------|-----------|
| Mn | 0.055312  | -1.448314 | 0.000000  | 0.057220  | -1.360861 | 0.000000  |
| Mn | 0.298002  | 1.590435  | 0.000000  | 0.319899  | 1.524737  | 0.000000  |
| C  | 0.412166  | 0.100696  | 2.887286  | 0.469001  | 0.093648  | 2.883430  |
| C  | 0.412166  | 0.100696  | -2.887286 | 0.469001  | 0.093648  | -2.883430 |
| C  | 1.005804  | -2.972726 | 0.000000  | 0.914772  | -2.908642 | 0.000000  |
| C  | -1.053233 | -2.060397 | 1.304287  | -1.058947 | -1.950756 | 1.279786  |
| C  | -1.053233 | -2.060397 | -1.304287 | -1.058947 | -1.950756 | -1.279786 |
| C  | -1.458997 | 1.219126  | 0.000000  | -1.408427 | 1.129807  | 0.000000  |
| C  | 0.058330  | 2.808438  | 1.333216  | 0.015836  | 2.717197  | 1.317727  |
| C  | 0.058330  | 2.808438  | -1.333216 | 0.015836  | 2.717197  | -1.317727 |
| O  | 1.653779  | -3.933272 | 0.000000  | 1.504875  | -3.926144 | 0.000000  |
| O  | -0.167587 | 0.184173  | -3.891858 | -0.095202 | 0.161070  | -3.911242 |
| O  | -0.167587 | 0.184173  | 3.891858  | -0.095202 | 0.161070  | 3.911242  |
| O  | -0.087241 | 3.590706  | -2.173642 | -0.189192 | 3.512143  | -2.156526 |
| O  | -0.087241 | 3.590706  | 2.173642  | -0.189192 | 3.512143  | 2.156526  |
| O  | -2.601148 | 1.010961  | 0.000000  | -2.573906 | 0.956521  | 0.000000  |
| O  | -1.775109 | -2.463372 | 2.115953  | -1.805707 | -2.369735 | 2.084899  |
| O  | -1.775109 | -2.463372 | -2.115953 | -1.805707 | -2.369735 | -2.084899 |
| P  | 1.364570  | -0.027396 | 1.486533  | 1.413904  | -0.028121 | 1.461937  |
| P  | 1.364570  | -0.027396 | -1.486533 | 1.413904  | -0.028121 | -1.461937 |

Table S21. Coordinates of Mn<sub>2</sub>(CO)<sub>5</sub>(PCO)<sub>2</sub> **25-1S(C<sub>s</sub>)**.

|    | B3LYP     |           |           | BP86      |           |           |
|----|-----------|-----------|-----------|-----------|-----------|-----------|
| Mn | -0.008756 | 1.362095  | 0.000000  | 0.003157  | -1.338760 | 0.000000  |
| Mn | -0.045354 | -1.349917 | 0.000000  | 0.040618  | 1.333101  | 0.000000  |
| C  | -0.678759 | 2.551138  | 1.251578  | 0.688903  | -2.504623 | 1.249097  |
| C  | -0.678759 | 2.551138  | -1.251578 | 0.688903  | -2.504623 | -1.249097 |
| C  | 1.694901  | 1.972496  | 0.000000  | -1.673618 | -1.999093 | 0.000000  |
| C  | 1.833284  | -1.233633 | 0.000000  | -1.821625 | 1.189548  | 0.000000  |
| C  | -0.043734 | -2.630176 | 1.321582  | 0.043142  | 2.623983  | 1.301554  |
| C  | -1.920857 | -1.270018 | 0.000000  | 1.897077  | 1.214564  | 0.000000  |
| C  | -0.043734 | -2.630176 | -1.321582 | 0.043142  | 2.623983  | -1.301554 |
| P  | -0.092762 | 0.195714  | 1.795117  | 0.077420  | -0.171583 | 1.819702  |
| P  | -0.092762 | 0.195714  | -1.795117 | 0.077420  | -0.171583 | -1.819702 |
| O  | -0.043340 | -3.450797 | 2.134807  | 0.045235  | 3.472110  | 2.106692  |
| O  | -3.072682 | -1.221995 | 0.000000  | 3.063011  | 1.147973  | 0.000000  |
| O  | -0.043340 | -3.450797 | -2.134807 | 0.045235  | 3.472110  | -2.106692 |
| O  | 2.786889  | 2.354630  | 0.000000  | -2.761833 | -2.434361 | 0.000000  |
| O  | 2.984024  | -1.174811 | 0.000000  | -2.986745 | 1.125570  | 0.000000  |
| O  | -1.108179 | 3.344353  | 1.977600  | 1.134265  | -3.302543 | 1.984242  |
| O  | -1.108179 | 3.344353  | -1.977600 | 1.134265  | -3.302543 | -1.984242 |

Table S22. Coordinates of Mn<sub>2</sub>(CO)<sub>5</sub>(PCO)<sub>2</sub> **25-2S(C<sub>s</sub>)**.

|    | B3LYP     |           |           | BP86      |           |           |
|----|-----------|-----------|-----------|-----------|-----------|-----------|
| Mn | -0.001656 | -1.267224 | 0.000000  | -0.023711 | -1.261227 | 0.000000  |
| Mn | -0.291108 | 1.637711  | 0.000000  | -0.316117 | 1.606215  | 0.000000  |
| C  | 0.137935  | -1.287522 | 1.866904  | 0.129728  | -1.300652 | 1.845994  |
| C  | 0.137935  | -1.287522 | -1.866904 | 0.129728  | -1.300652 | -1.845994 |
| C  | -0.750911 | -2.921550 | 0.000000  | -0.663517 | -2.940944 | 0.000000  |
| C  | 1.741083  | -1.864739 | 0.000000  | 1.740819  | -1.721634 | 0.000000  |
| C  | 1.458148  | 1.224054  | 0.000000  | 1.439493  | 1.323075  | 0.000000  |
| C  | 0.032536  | 2.698763  | -1.449497 | -0.030692 | 2.656991  | -1.451563 |
| C  | 0.032536  | 2.698763  | 1.449497  | -0.030692 | 2.656991  | 1.451563  |
| P  | -1.737422 | 0.140346  | 1.059799  | -1.701010 | 0.093848  | 1.085309  |
| P  | -1.737422 | 0.140346  | -1.059799 | -1.701010 | 0.093848  | -1.085309 |
| O  | 0.357419  | -1.397007 | 2.994850  | 0.366865  | -1.436147 | 2.984443  |
| O  | -1.263541 | -3.954733 | 0.000000  | -1.104514 | -4.024778 | 0.000000  |
| O  | 0.357419  | -1.397007 | -2.994850 | 0.366865  | -1.436147 | -2.984443 |
| O  | 2.827566  | -2.243612 | 0.000000  | 2.865893  | -2.029569 | 0.000000  |
| O  | 0.221088  | 3.390989  | -2.361207 | 0.145489  | 3.358844  | -2.377527 |
| O  | 0.221088  | 3.390989  | 2.361207  | 0.145489  | 3.358844  | 2.377527  |
| O  | 2.617234  | 1.081130  | 0.000000  | 2.618516  | 1.249055  | 0.000000  |

Table S23. Coordinates of Mn<sub>2</sub>(CO)<sub>5</sub>(PCO)<sub>2</sub> **25-1T(C<sub>1</sub>)**.

|    | B3LYP     |           |           | BP86      |           |           |
|----|-----------|-----------|-----------|-----------|-----------|-----------|
| Mn | 1.210592  | -0.042291 | -0.004345 | 1.221556  | -0.030138 | -0.013344 |
| Mn | -1.501464 | -0.130848 | -0.076301 | -1.476787 | -0.151313 | -0.130282 |
| C  | 1.265109  | -1.790343 | 0.649133  | 1.305022  | -1.823586 | 0.445338  |
| C  | 1.105113  | 1.805642  | -0.252204 | 1.100847  | 1.818641  | -0.025191 |
| C  | 2.748355  | -0.218984 | -0.965999 | 2.815758  | -0.052699 | -0.869724 |
| C  | 2.028927  | 0.389045  | 1.573458  | 1.886002  | 0.224072  | 1.658624  |
| C  | -0.967069 | 0.258820  | 1.666447  | -1.138350 | 0.171216  | 1.634810  |
| C  | -2.225856 | 1.580594  | -0.227673 | -2.348787 | 1.447527  | -0.241836 |
| C  | -3.068538 | -1.125223 | 0.240788  | -2.952527 | -1.208697 | 0.131733  |
| P  | -0.244587 | -1.525790 | -1.459131 | -0.122700 | -1.360894 | -1.596165 |
| P  | -0.253713 | 0.443464  | -2.033616 | -0.152496 | 0.693170  | -1.948106 |
| O  | 1.367428  | -2.824498 | 1.155060  | 1.437334  | -2.916024 | 0.846251  |
| O  | 3.721001  | -0.333486 | -1.577602 | 3.849348  | -0.069804 | -1.418309 |
| O  | 1.105848  | 2.960260  | -0.294512 | 1.101118  | 2.984269  | 0.083387  |
| O  | 2.549945  | 0.663029  | 2.565637  | 2.335985  | 0.390750  | 2.724274  |
| O  | -2.688439 | 2.642019  | -0.255328 | -2.932606 | 2.465711  | -0.265007 |
| O  | -4.020223 | -1.757375 | 0.404740  | -3.900327 | -1.880929 | 0.288217  |
| O  | -0.856807 | 0.545809  | 2.789961  | -1.078236 | 0.412690  | 2.785210  |

Table S24. Coordinates of Mn<sub>2</sub>(CO)<sub>5</sub>(PCO)<sub>2</sub> **25-3S(C<sub>s</sub>)**.

|    | B3LYP     |           |           | BP86      |           |           |
|----|-----------|-----------|-----------|-----------|-----------|-----------|
| Mn | -0.266413 | 0.026182  | 1.309708  | -0.246303 | 0.037729  | 1.292307  |
| Mn | -0.266413 | 0.026182  | -1.309708 | -0.246303 | 0.037729  | -1.292307 |
| C  | -1.538170 | -0.612787 | -2.443689 | -1.533895 | -0.574862 | -2.408279 |
| C  | 2.637375  | -0.018034 | 0.000000  | 2.575422  | -0.045796 | 0.000000  |
| C  | 0.974872  | -0.919350 | 2.251185  | 0.947854  | -0.929155 | 2.238178  |
| C  | 0.974872  | -0.919350 | -2.251185 | 0.947854  | -0.929155 | -2.238178 |
| C  | -0.261549 | 1.560591  | -2.311312 | -0.214344 | 1.534340  | -2.317549 |
| C  | -1.538170 | -0.612787 | 2.443689  | -1.533895 | -0.574862 | 2.408279  |
| C  | -0.261549 | 1.560591  | 2.311312  | -0.214344 | 1.534340  | 2.317549  |
| O  | -2.293282 | -0.988680 | -3.237843 | -2.311301 | -0.937224 | -3.210035 |
| O  | 1.731878  | -1.589846 | -2.815139 | 1.681263  | -1.627750 | -2.831754 |
| O  | 1.731878  | -1.589846 | 2.815139  | 1.681263  | -1.627750 | 2.831754  |
| O  | -0.327444 | 2.544076  | -2.916177 | -0.267876 | 2.513737  | -2.960355 |
| O  | -2.293282 | -0.988680 | 3.237843  | -2.311301 | -0.937224 | 3.210035  |
| O  | -0.327444 | 2.544076  | 2.916177  | -0.267876 | 2.513737  | 2.960355  |
| O  | 3.572203  | -0.701861 | 0.000000  | 3.478940  | -0.791634 | 0.000000  |
| P  | -1.824402 | -0.834203 | 0.000000  | -1.818943 | -0.841647 | 0.000000  |
| P  | 1.360303  | 1.142453  | 0.000000  | 1.352434  | 1.186801  | 0.000000  |

Table S25. Coordinates of Mn(CO)<sub>5</sub>(PCO) **15-1S(C<sub>s</sub>)**.

|    | B3LYP     |           |           | BP86      |           |           |
|----|-----------|-----------|-----------|-----------|-----------|-----------|
| Mn | 0.177856  | -0.475291 | 0.000000  | -0.181568 | -0.465198 | 0.000000  |
| C  | 0.180551  | -0.279507 | 1.868522  | 1.666708  | -0.311763 | 0.000000  |
| C  | -1.686760 | -0.280026 | 0.000000  | -0.185095 | -0.243347 | 1.845530  |
| C  | 0.048738  | -2.299777 | 0.000000  | -0.059656 | -2.274935 | 0.000000  |
| C  | 2.050589  | -0.543607 | 0.000000  | -0.185095 | -0.243347 | -1.845530 |
| C  | 0.180551  | -0.279507 | -1.868522 | -2.033724 | -0.563411 | 0.000000  |
| C  | -1.028928 | 2.545473  | 0.000000  | 1.048459  | 2.524872  | 0.000000  |
| O  | 0.180551  | -0.141819 | -3.010579 | -3.196232 | -0.648023 | 0.000000  |
| O  | -0.035277 | -3.451967 | 0.000000  | 0.021888  | -3.442571 | 0.000000  |
| O  | 0.180551  | -0.141819 | 3.010579  | 2.830684  | -0.258205 | 0.000000  |
| O  | 3.200351  | -0.589710 | 0.000000  | -0.185095 | -0.093285 | -3.001132 |
| O  | -2.833102 | -0.185219 | 0.000000  | -0.185095 | -0.093285 | 3.001132  |
| O  | -2.118206 | 2.992787  | 0.000000  | 2.144191  | 2.987947  | 0.000000  |
| P  | 0.565748  | 2.056398  | 0.000000  | -0.560874 | 2.045396  | 0.000000  |

Table S26. Coordinates of Mn(CO)<sub>5</sub>(PCO) **15-2S(C<sub>s</sub>)**.

|    | B3LYP     |           |           | BP86      |           |           |
|----|-----------|-----------|-----------|-----------|-----------|-----------|
| Mn | -0.303204 | -0.501584 | 0.000000  | 0.316126  | -0.505330 | 0.000000  |
| C  | -0.297961 | -0.355083 | 1.891677  | 2.182130  | -0.406823 | 0.000000  |
| C  | -2.197228 | -0.422848 | 0.000000  | 0.310713  | -0.368351 | 1.865172  |
| C  | -0.321241 | -2.342931 | 0.000000  | 0.379261  | -2.320567 | 0.000000  |
| C  | 1.600476  | -0.495338 | 0.000000  | 0.310713  | -0.368351 | -1.865172 |
| C  | -0.297961 | -0.355083 | -1.891677 | -1.550303 | -0.539644 | 0.000000  |
| C  | 0.626809  | 2.308183  | 0.000000  | -0.703199 | 2.334494  | 0.000000  |
| O  | -0.297961 | -0.231462 | -3.031112 | -2.710325 | -0.586865 | 0.000000  |
| O  | -0.325166 | -3.497415 | 0.000000  | 0.406002  | -3.490685 | 0.000000  |
| O  | -0.297961 | -0.231462 | 3.031112  | 3.344034  | -0.372665 | 0.000000  |
| O  | 2.743815  | -0.556526 | 0.000000  | 0.310713  | -0.281244 | -3.024078 |
| O  | -3.342556 | -0.372189 | 0.000000  | 0.310713  | -0.281244 | 3.024078  |
| P  | 1.878558  | 3.273927  | 0.000000  | -1.962076 | 3.321337  | 0.000000  |
| O  | -0.389622 | 1.565217  | 0.000000  | 0.332876  | 1.616284  | 0.000000  |



Table S27. Coordinates of Mn(CO)<sub>4</sub>(PCO) **14-1S(C<sub>s</sub>)**.

|    | B3LYP     |           |           | BP86      |           |           |
|----|-----------|-----------|-----------|-----------|-----------|-----------|
| Mn | 0.232751  | -0.286362 | 0.000000  | 0.229968  | -0.266512 | 0.000000  |
| C  | -1.632707 | -0.244646 | 0.000000  | -1.617402 | -0.241938 | 0.000000  |
| C  | 0.233362  | -1.522345 | 1.336284  | 0.227693  | -1.494432 | 1.313006  |
| C  | 0.233362  | -1.522345 | -1.336284 | 0.227693  | -1.494432 | -1.313006 |
| C  | 2.101184  | -0.243364 | 0.000000  | 2.078771  | -0.253601 | 0.000000  |
| C  | -1.194989 | 2.490919  | 0.000000  | -1.189426 | 2.476798  | 0.000000  |
| O  | -2.785616 | -0.274324 | 0.000000  | -2.784827 | -0.305950 | 0.000000  |
| O  | 0.233362  | -2.263948 | -2.223856 | 0.227693  | -2.258895 | -2.202616 |
| O  | 0.233362  | -2.263948 | 2.223856  | 0.227693  | -2.258895 | 2.202616  |
| O  | 3.253959  | -0.254981 | 0.000000  | 3.246554  | -0.303350 | 0.000000  |
| O  | -2.282673 | 2.917718  | 0.000000  | -2.284723 | 2.916501  | 0.000000  |
| P  | 0.434719  | 2.035040  | 0.000000  | 0.455180  | 2.026210  | 0.000000  |

Table S28. Coordinates of Mn(CO)<sub>4</sub>(PCO) **14-2S(C<sub>s</sub>)**.

|    | B3LYP     |           |           | BP86      |           |           |
|----|-----------|-----------|-----------|-----------|-----------|-----------|
| Mn | 0.266441  | -0.431157 | 0.000000  | 0.261706  | -0.415391 | 0.000000  |
| C  | 2.172997  | -0.387553 | 0.000000  | 2.137641  | -0.438325 | 0.000000  |
| C  | 0.268263  | -1.688813 | 1.316448  | 0.265867  | -1.656319 | 1.298534  |
| C  | 0.268263  | -1.688813 | -1.316448 | 0.265867  | -1.656319 | -1.298534 |
| C  | -1.627174 | -0.411666 | 0.000000  | -1.598727 | -0.455399 | 0.000000  |
| O  | 0.268263  | -2.443627 | -2.192627 | 0.265867  | -2.435618 | -2.175479 |
| O  | 0.268263  | -2.443627 | 2.192627  | 0.265867  | -2.435618 | 2.175479  |
| O  | 3.320128  | -0.395340 | 0.000000  | 3.297633  | -0.540423 | 0.000000  |
| O  | -2.774075 | -0.447062 | 0.000000  | -2.759409 | -0.554912 | 0.000000  |
| C  | -0.472247 | 2.441240  | 0.000000  | -0.474995 | 2.476449  | 0.000000  |
| P  | -1.445525 | 3.681329  | 0.000000  | -1.412577 | 3.768544  | 0.000000  |
| O  | 0.337578  | 1.476233  | 0.000000  | 0.314055  | 1.496081  | 0.000000  |

Table S29. Coordinates of Mn(CO)<sub>3</sub>(PCO) **13-1S(C<sub>s</sub>)**.

|    | B3LYP     |           |           | BP86      |           |           |
|----|-----------|-----------|-----------|-----------|-----------|-----------|
| Mn | -0.054569 | -0.035802 | 0.000000  | -0.084123 | -0.028132 | 0.000000  |
| C  | 1.743666  | 0.139223  | 0.000000  | 1.692369  | 0.071786  | 0.000000  |
| C  | -0.041438 | -1.293540 | 1.318207  | -0.094997 | -1.279536 | 1.287352  |
| C  | -0.041438 | -1.293540 | -1.318207 | -0.094997 | -1.279536 | -1.287352 |
| O  | -0.041438 | -2.045155 | 2.196769  | -0.094997 | -2.050400 | 2.172321  |
| O  | -0.041438 | -2.045155 | -2.196769 | -0.094997 | -2.050400 | -2.172321 |
| O  | 2.896398  | 0.245090  | 0.000000  | 2.866134  | 0.114962  | 0.000000  |
| C  | -1.536407 | 1.334686  | 0.000000  | -1.469692 | 1.413695  | 0.000000  |
| P  | -0.252377 | 2.363694  | 0.000000  | -0.075656 | 2.330932  | 0.000000  |
| O  | -2.263076 | 0.360055  | 0.000000  | -2.295913 | 0.508448  | 0.000000  |

Table S30. Coordinates of Mn(CO)<sub>3</sub>(PCO) **13-2S(C<sub>3v</sub>)**.

|    | B3LYP     |           |           | BP86      |           |           |
|----|-----------|-----------|-----------|-----------|-----------|-----------|
| Mn | 0.000000  | 0.000000  | 0.466896  | 0.000000  | 0.000000  | 0.457128  |
| C  | 0.000000  | 1.493461  | 1.484923  | 0.000000  | 1.450241  | 1.483079  |
| C  | -1.293375 | -0.746730 | 1.484923  | -1.255945 | -0.725120 | 1.483079  |
| C  | 1.293375  | -0.746730 | 1.484923  | 1.255945  | -0.725120 | 1.483079  |
| O  | -2.143380 | -1.237481 | 2.098196  | -2.104297 | -1.214916 | 2.133439  |
| O  | 2.143380  | -1.237481 | 2.098196  | 2.104297  | -1.214916 | 2.133439  |
| O  | 0.000000  | 2.474962  | 2.098196  | 0.000000  | 2.429833  | 2.133439  |
| O  | 0.000000  | 0.000000  | -1.335699 | 0.000000  | 0.000000  | -1.345280 |
| C  | 0.000000  | 0.000000  | -2.596304 | 0.000000  | 0.000000  | -2.606705 |
| P  | 0.000000  | 0.000000  | -4.166287 | 0.000000  | 0.000000  | -4.194914 |

Table S31. Coordinates of Mn(CO)<sub>3</sub>(PCO) **13-1T(C<sub>s</sub>)**.

|    | B3LYP     |           |          | BP86      |           |          |
|----|-----------|-----------|----------|-----------|-----------|----------|
| Mn | 0.000000  | 0.551883  | 0.000000 | 0.000000  | 0.533139  | 0.000000 |
| C  | 1.678889  | 1.391268  | 0.000000 | 1.635006  | 1.406741  | 0.000000 |
| C  | 0.165798  | -2.625779 | 0.000000 | 0.178128  | -2.614576 | 0.000000 |
| C  | -1.583809 | -0.448560 | 0.000000 | -1.570314 | -0.448646 | 0.000000 |
| C  | -0.970354 | 2.225934  | 0.000000 | -0.947529 | 2.162020  | 0.000000 |
| O  | -2.579492 | -1.035985 | 0.000000 | -2.589901 | -1.026964 | 0.000000 |
| O  | -1.557398 | 3.214824  | 0.000000 | -1.538702 | 3.168908  | 0.000000 |
| O  | 2.713161  | 1.907331  | 0.000000 | 2.661423  | 1.972742  | 0.000000 |
| P  | 1.344362  | -1.426856 | 0.000000 | 1.347887  | -1.386096 | 0.000000 |
| O  | -0.564844 | -3.542595 | 0.000000 | -0.531576 | -3.560970 | 0.000000 |

Table S32. Harmonic vibrational frequencies( $\text{cm}^{-1}$ ) and IR intensities (KM/Mole) of  $\text{Mn}_2(\text{CO})_8(\text{PCO})_2$  **28-1S**( $\text{C}_{2h}$ ).

| B3LYP                                                                                                                                                                                                                                                                                                                                                                                                                                                                                                                                                             | BP86                                                                                                                                                                                                                                                                                                                                                                                                                                                                                                                                                           |
|-------------------------------------------------------------------------------------------------------------------------------------------------------------------------------------------------------------------------------------------------------------------------------------------------------------------------------------------------------------------------------------------------------------------------------------------------------------------------------------------------------------------------------------------------------------------|----------------------------------------------------------------------------------------------------------------------------------------------------------------------------------------------------------------------------------------------------------------------------------------------------------------------------------------------------------------------------------------------------------------------------------------------------------------------------------------------------------------------------------------------------------------|
| 18(0), 44(0), 49(0), 54(0), 58(0), 66(1), 66(1), 70(0), 76(0), 76(0), 80(0), 81(0), 89(0), 92(0), 95(0), 101(1), 107(0), 107(0), 110(0), 119(0), 135(0), 140(0), 192(0), 214(0), 228(0), 253(2), 399(6), 402(0), 415(0), 416(0), 417(0), 419(4), 449(0), 450(0), 463(12), 464(0), 464(0), 471(11), 474(52), 476(0), 482(8), 482(0), 500(0), 502(11), 551(6), 554(0), 575(0), 577(1), 630(0), 638(160), 643(0), 644(135), 669(313), 677(0), 704(31), 704(0), 2019(683), 2024(0), 2060(0), 2061(0), 2064(1836), 2072(808), 2080(0), 2087(2930), 2121(1439), 2155(0) | 11(0), 41(0), 45(0), 51(0), 55(0), 64(1), 65(1), 67(0), 71(0), 73(0), 78(0), 79(0), 86(0), 89(0), 91(0), 97(1), 103(0), 103(0), 107(0), 115(0), 130(0), 139(0), 204(1), 226(0), 243(0), 267(2), 415(2), 416(0), 420(0), 424(0), 428(2), 430(0), 449(0), 450(4), 454(0), 457(0), 468(0), 473(20), 488(0), 488(0), 491(0), 491(5), 492(0), 496(36), 539(7), 542(0), 564(0), 566(1), 634(0), 639(145), 641(0), 646(142), 671(281), 677(0), 681(0), 681(11), 1952(111), 1962(0), 1968(0), 1973(0), 1976(1699), 1986(631), 1994(0), 1997(2817), 2039(1248), 2068(0) |

Table S33. Harmonic vibrational frequencies( $\text{cm}^{-1}$ ) and IR intensities (KM/Mole) of  $\text{Mn}_2(\text{CO})_8(\text{PCO})_2$  **28-2S**( $\text{C}_{2v}$ ).

| B3LYP                                                                                                                                                                                                                                                                                                                                                                                                                                                                                                                                                                  | BP86                                                                                                                                                                                                                                                                                                                                                                                                                                                                                                                                                              |
|------------------------------------------------------------------------------------------------------------------------------------------------------------------------------------------------------------------------------------------------------------------------------------------------------------------------------------------------------------------------------------------------------------------------------------------------------------------------------------------------------------------------------------------------------------------------|-------------------------------------------------------------------------------------------------------------------------------------------------------------------------------------------------------------------------------------------------------------------------------------------------------------------------------------------------------------------------------------------------------------------------------------------------------------------------------------------------------------------------------------------------------------------|
| 23(0), 44(0), 48(0), 54(0), 60(0), 63(0), 65(1), 70(0), 76(0), 78(0), 79(0), 81(0), 88(0), 92(0), 95(0), 100(1), 107(0), 108(0), 110(0), 119(0), 134(0), 141(0), 192(0), 214(0), 226(0), 252(2), 400(6), 402(1), 414(0), 416(1), 416(0), 419(4), 449(0), 450(0), 462(13), 464(0), 464(0), 470(10), 473(47), 476(0), 480(4), 484(13), 497(0), 502(9), 551(5), 555(0), 575(0), 576(0), 631(0), 639(152), 641(3), 643(143), 669(310), 677(0), 703(27), 706(3), 2021(155), 2023(463), 2060(2), 2061(0), 2064(2010), 2072(809), 2079(239), 2087(2506), 2121(1437), 2155(23) | 23(0), 41(0), 44(0), 51(0), 59(0), 60(0), 63(1), 68(0), 72(0), 77(0), 77(0), 79(0), 84(0), 90(0), 91(0), 99(1), 103(0), 104(0), 107(0), 115(0), 129(0), 139(0), 202(1), 226(0), 239(0), 264(1), 415(0), 416(0), 419(4), 423(0), 428(1), 429(1), 449(3), 450(0), 454(0), 458(1), 469(0), 469(18), 487(0), 488(0), 491(3), 491(0), 492(0), 495(38), 539(7), 543(0), 563(0), 565(0), 636(0), 638(2), 639(139), 644(146), 671(280), 678(0), 679(11), 683(0), 1956(0), 1958(11), 1967(0), 1973(0), 1981(2058), 1986(631), 1991(1001), 1998(1498), 2039(1246), 2068(17) |

Table S34. Harmonic vibrational frequencies( $\text{cm}^{-1}$ ) and IR intensities (KM/Mole) of  $\text{Mn}_2(\text{CO})_8(\text{PCO})_2$  **28-3S(C<sub>1</sub>)**.

| B3LYP                                                                                                                                                                                                                                                                                                                                                                                                                                                                                                                                                                       | BP86                                                                                                                                                                                                                                                                                                                                                                                                                                                                                                                                                                     |
|-----------------------------------------------------------------------------------------------------------------------------------------------------------------------------------------------------------------------------------------------------------------------------------------------------------------------------------------------------------------------------------------------------------------------------------------------------------------------------------------------------------------------------------------------------------------------------|--------------------------------------------------------------------------------------------------------------------------------------------------------------------------------------------------------------------------------------------------------------------------------------------------------------------------------------------------------------------------------------------------------------------------------------------------------------------------------------------------------------------------------------------------------------------------|
| 14(0), 37(0), 46(0), 50(0), 60(0), 68(0), 70(0), 76(1), 79(0), 83(0), 85(0), 89(0), 91(0), 97(0), 99(0), 104(0), 105(0), 114(0), 124(0), 125(0), 141(1), 170(1), 189(0), 209(0), 245(2), 275(15), 382(2), 396(3), 399(1), 405(5), 412(0), 413(3), 432(23), 449(0), 452(12), 452(24), 453(7), 467(5), 470(1), 472(2), 473(5), 483(2), 499(2), 510(9), 551(8), 558(4), 571(1), 573(2), 622(23), 629(119), 641(52), 644(75), 666(282), 672(13), 713(5), 835(7), 1828(821), 2022(149), 2057(614), 2068(964), 2074(1004), 2076(556), 2090(557), 2099(1885), 2132(867), 2162(158) | 13(0), 37(0), 45(0), 50(0), 57(0), 65(0), 68(0), 76(0), 76(0), 80(0), 84(0), 87(0), 90(0), 95(1), 97(0), 101(0), 104(0), 112(0), 121(0), 124(0), 140(0), 179(1), 199(1), 223(0), 250(6), 278(3), 401(0), 409(2), 412(0), 415(1), 416(0), 425(2), 438(4), 446(1), 453(2), 455(2), 459(19), 466(1), 475(16), 476(16), 480(3), 492(1), 496(1), 498(1), 542(3), 548(2), 560(0), 564(4), 631(17), 635(111), 642(56), 644(66), 669(259), 678(33), 690(0), 801(5), 1775(429), 1957(14), 1974(48), 1979(801), 1981(854), 1989(743), 1997(1094), 2002(1302), 2047(968), 2073(141) |

Table S35. Harmonic vibrational frequencies( $\text{cm}^{-1}$ ) and IR intensities (KM/Mole) of  $\text{Mn}_2(\text{CO})_7(\text{PCO})_2$  **27-1S(C<sub>s</sub>)**.

| B3LYP                                                                                                                                                                                                                                                                                                                                                                                                                                                                                                                        | BP86                                                                                                                                                                                                                                                                                                                                                                                                                                                                                                                     |
|------------------------------------------------------------------------------------------------------------------------------------------------------------------------------------------------------------------------------------------------------------------------------------------------------------------------------------------------------------------------------------------------------------------------------------------------------------------------------------------------------------------------------|--------------------------------------------------------------------------------------------------------------------------------------------------------------------------------------------------------------------------------------------------------------------------------------------------------------------------------------------------------------------------------------------------------------------------------------------------------------------------------------------------------------------------|
| 7(0), 23(0), 28(0), 49(0), 60(0), 65(0), 67(0), 73(0), 84(0), 85(0), 90(0), 95(0), 95(0), 97(0), 106(1), 107(1), 108(1), 116(0), 135(1), 162(0), 165(0), 218(9), 341(8), 362(0), 388(12), 397(0), 402(3), 409(0), 411(1), 412(0), 430(10), 441(5), 447(18), 447(21), 455(10), 473(3), 473(34), 484(7), 501(0), 537(11), 546(0), 548(2), 557(0), 581(0), 633(67), 644(69), 656(84), 658(130), 664(519), 669(86), 678(51), 2034(775), 2049(1119), 2054(596), 2091(829), 2103(897), 2107(1447), 2109(1682), 2121(11), 2173(342) | 8(0), 23(0), 28(0), 47(0), 55(0), 60(0), 61(0), 67(0), 80(0), 81(0), 86(0), 90(0), 91(0), 93(0), 102(1), 102(1), 104(1), 111(0), 135(0), 159(0), 163(1), 213(9), 347(28), 368(0), 405(0), 406(0), 410(0), 416(4), 423(0), 428(2), 434(6), 434(1), 465(13), 465(12), 470(3), 481(0), 483(1), 488(22), 492(2), 522(7), 532(0), 534(2), 545(0), 564(0), 625(65), 643(27), 651(68), 659(120), 664(290), 668(328), 675(31), 1956(630), 1961(973), 1975(436), 2006(648), 2015(988), 2016(1334), 2030(1262), 2035(0), 2090(310) |

Table S36. Harmonic vibrational frequencies( $\text{cm}^{-1}$ ) and IR intensities (KM/Mole) of  $\text{Mn}_2(\text{CO})_7(\text{PCO})_2$  **27-2S(C<sub>s</sub>)**.

| B3LYP                                                                                                                                                                                                                                                                                                                                                                                                                                                                                                                           | BP86                                                                                                                                                                                                                                                                                                                                                                                                                                                                                                                    |
|---------------------------------------------------------------------------------------------------------------------------------------------------------------------------------------------------------------------------------------------------------------------------------------------------------------------------------------------------------------------------------------------------------------------------------------------------------------------------------------------------------------------------------|-------------------------------------------------------------------------------------------------------------------------------------------------------------------------------------------------------------------------------------------------------------------------------------------------------------------------------------------------------------------------------------------------------------------------------------------------------------------------------------------------------------------------|
| 7(0), 10(0), 26(0), 43(0), 44(0), 58(0), 69(0), 70(0), 78(0), 80(0), 90(0), 91(0), 96(0), 100(0), 101(0), 103(0), 112(2), 121(1), 124(1), 180(2), 180(0), 244(8), 306(5), 365(0), 390(0), 392(19), 403(0), 410(1), 412(0), 413(4), 424(0), 429(2), 451(13), 453(8), 454(21), 462(7), 481(11), 495(25), 498(1), 512(10), 550(0), 552(1), 560(1), 575(0), 627(87), 641(61), 656(164), 661(127), 663(186), 669(367), 698(129), 2049(1002), 2064(982), 2066(608), 2082(792), 2094(945), 2096(1648), 2109(40), 2114(2263), 2164(278) | 7(0), 16(0), 25(0), 39(0), 43(0), 54(0), 63(0), 65(0), 73(0), 76(0), 86(0), 88(0), 93(0), 97(0), 97(0), 99(0), 108(2), 116(1), 119(0), 174(0), 178(2), 245(15), 314(0), 369(0), 391(0), 406(2), 407(0), 418(3), 419(4), 427(0), 431(0), 435(2), 453(5), 468(12), 471(12), 477(1), 481(1), 491(4), 501(1), 504(11), 537(0), 539(1), 547(1), 559(0), 621(82), 638(37), 646(77), 662(118), 664(127), 670(480), 689(94), 1967(909), 1979(863), 1985(398), 1998(701), 2006(951), 2007(1505), 2026(17), 2038(1628), 2083(269) |

Table S37. Harmonic vibrational frequencies( $\text{cm}^{-1}$ ) and IR intensities (KM/Mole) of  $\text{Mn}_2(\text{CO})_7(\text{PCO})_2$  **27-3S(C<sub>s</sub>)**.

| B3LYP                                                                                                                                                                                                                                                                                                                                                                                                                                                                                                                     | BP86                                                                                                                                                                                                                                                                                                                                                                                                                                                                                                                 |
|---------------------------------------------------------------------------------------------------------------------------------------------------------------------------------------------------------------------------------------------------------------------------------------------------------------------------------------------------------------------------------------------------------------------------------------------------------------------------------------------------------------------------|----------------------------------------------------------------------------------------------------------------------------------------------------------------------------------------------------------------------------------------------------------------------------------------------------------------------------------------------------------------------------------------------------------------------------------------------------------------------------------------------------------------------|
| 30(14), 39(0), 50(1), 55(0), 65(0), 67(0), 71(24), 73(0), 86(6), 89(0), 90(0), 92(0), 96(0), 97(0), 109(0), 114(0), 129(0), 137(0), 160(37), 183(0), 216(0), 234(1), 245(3), 266(6), 318(64), 356(0), 419(3), 450(4), 450(1), 451(5), 452(1), 454(24), 469(18), 476(6), 480(0), 481(6), 483(0), 499(1), 505(3), 517(21), 517(22), 527(0), 554(18), 602(0), 604(71), 620(76), 640(6), 653(233), 665(25), 672(15), 690(21), 1986(449), 2026(160), 2030(517), 2054(5), 2067(2013), 2068(0), 2076(1876), 2101(2297), 2137(83) | 38(0), 43(0), 48(0), 51(0), 62(0), 64(0), 70(0), 80(0), 86(0), 87(0), 90(0), 94(0), 95(0), 105(4), 109(6), 110(0), 126(0), 130(0), 188(48), 192(0), 225(1), 244(0), 262(0), 285(1), 342(89), 376(0), 418(2), 438(9), 443(1), 453(1), 457(1), 459(0), 460(0), 469(46), 472(2), 479(0), 489(1), 502(7), 502(0), 515(12), 519(10), 538(0), 550(10), 600(0), 601(77), 620(74), 638(0), 648(221), 651(13), 662(16), 667(7), 1888(333), 1954(0), 1961(259), 1968(3), 1980(6), 1984(1685), 1992(1785), 2018(1974), 2050(62) |

Table S38. Harmonic vibrational frequencies( $\text{cm}^{-1}$ ) and IR intensities (KM/Mole) of  $\text{Mn}_2(\text{CO})_7(\text{PCO})_2$  **27-4S(C<sub>2v</sub>)**.

| B3LYP                                                                                                                                                                                                                                                                                                                                                                                                                                                                                                                  | BP86                                                                                                                                                                                                                                                                                                                                                                                                                                                                                                                |
|------------------------------------------------------------------------------------------------------------------------------------------------------------------------------------------------------------------------------------------------------------------------------------------------------------------------------------------------------------------------------------------------------------------------------------------------------------------------------------------------------------------------|---------------------------------------------------------------------------------------------------------------------------------------------------------------------------------------------------------------------------------------------------------------------------------------------------------------------------------------------------------------------------------------------------------------------------------------------------------------------------------------------------------------------|
| 40(0), 47(0), 51(0), 58(8), 66(22), 71(0), 71(0), 76(0), 79(0), 90(4), 90(0), 92(1), 97(0), 97(0), 110(0), 115(0), 128(0), 137(0), 168(42), 183(1), 212(0), 232(1), 237(4), 268(3), 319(68), 357(0), 421(4), 449(8), 451(29), 451(0), 453(0), 453(0), 473(0), 478(6), 478(6), 481(5), 485(0), 498(9), 507(0), 516(20), 516(20), 530(0), 557(9), 605(0), 606(73), 619(74), 639(4), 655(236), 667(17), 682(36), 690(8), 1984(341), 2023(260), 2029(59), 2051(0), 2067(26), 2072(2809), 2076(1279), 2102(2272), 2139(138) | 40(0), 41(0), 48(0), 56(0), 69(0), 69(0), 73(0), 74(0), 83(0), 88(0), 91(1), 95(0), 97(0), 106(4), 109(0), 111(3), 124(0), 133(0), 193(1), 200(45), 217(0), 241(0), 252(0), 285(0), 346(100), 377(0), 421(3), 431(0), 451(0), 454(2), 454(0), 459(0), 460(0), 467(4), 468(35), 478(3), 492(1), 502(9), 504(0), 514(12), 520(8), 541(0), 553(3), 602(75), 604(0), 619(72), 637(0), 650(222), 663(13), 666(12), 672(12), 1885(282), 1949(3), 1965(0), 1966(270), 1979(0), 1988(875), 1996(2406), 2017(1986), 2051(92) |

Table S39. Harmonic vibrational frequencies( $\text{cm}^{-1}$ ) and IR intensities (KM/Mole) of  $\text{Mn}_2(\text{CO})_7(\text{PCO})_2$  **27-5S(C<sub>1</sub>)**.

| B3LYP                                                                                                                                                                                                                                                                                                                                                                                                                                                                                                                      | BP86                                                                                                                                                                                                                                                                                                                                                                                                                                                                                                                  |
|----------------------------------------------------------------------------------------------------------------------------------------------------------------------------------------------------------------------------------------------------------------------------------------------------------------------------------------------------------------------------------------------------------------------------------------------------------------------------------------------------------------------------|-----------------------------------------------------------------------------------------------------------------------------------------------------------------------------------------------------------------------------------------------------------------------------------------------------------------------------------------------------------------------------------------------------------------------------------------------------------------------------------------------------------------------|
| 20(0), 30(0), 38(0), 48(1), 49(0), 57(1), 66(0), 71(0), 74(0), 79(0), 81(0), 86(0), 92(0), 95(0), 99(0), 103(0), 110(0), 114(0), 125(0), 144(0), 190(2), 218(1), 232(1), 268(10), 400(3), 402(0), 413(0), 418(2), 425(2), 446(0), 450(0), 456(1), 464(3), 466(6), 468(24), 476(7), 476(2), 495(13), 502(13), 505(8), 510(16), 551(3), 575(1), 611(35), 617(13), 634(81), 643(71), 672(189), 677(22), 698(11), 713(15), 2019(393), 2031(82), 2039(449), 2051(888), 2063(1378), 2078(709), 2079(1764), 2103(1608), 2145(175) | 22(0), 30(0), 35(0), 43(1), 46(0), 56(1), 64(0), 68(0), 71(0), 75(0), 80(0), 84(0), 89(0), 93(0), 96(0), 100(0), 107(0), 111(0), 122(0), 143(0), 197(1), 229(2), 244(1), 286(3), 409(1), 412(1), 420(1), 423(1), 428(1), 435(2), 448(1), 450(1), 460(3), 467(2), 482(9), 488(9), 491(6), 492(2), 494(13), 516(14), 536(5), 539(3), 564(1), 612(30), 618(14), 636(77), 642(68), 668(4), 674(162), 683(26), 691(6), 1945(154), 1946(376), 1959(265), 1970(12), 1980(1406), 1990(1992), 1994(522), 2014(1309), 2061(230) |

Table S40. Harmonic vibrational frequencies( $\text{cm}^{-1}$ ) and IR intensities (KM/Mole) of  $\text{Mn}_2(\text{CO})_7(\text{PCO})_2$  **27-6S(C<sub>s</sub>)**.

| B3LYP                                                                                                                                                                                                                                                                                                                                                                                                                                                                                                                  | BP86                                                                                                                                                                                                                                                                                                                                                                                                                                                                                                               |
|------------------------------------------------------------------------------------------------------------------------------------------------------------------------------------------------------------------------------------------------------------------------------------------------------------------------------------------------------------------------------------------------------------------------------------------------------------------------------------------------------------------------|--------------------------------------------------------------------------------------------------------------------------------------------------------------------------------------------------------------------------------------------------------------------------------------------------------------------------------------------------------------------------------------------------------------------------------------------------------------------------------------------------------------------|
| 25(0), 31(0), 37(0), 50(0), 51(0), 58(0), 60(1), 71(0), 72(0), 81(0), 81(0), 82(0), 90(0), 96(0), 98(0), 106(0), 110(0), 114(0), 120(0), 145(0), 183(2), 223(1), 232(1), 259(9), 398(3), 398(0), 412(0), 416(2), 423(2), 446(0), 455(0), 458(0), 463(3), 464(33), 470(2), 476(4), 477(6), 494(1), 502(18), 504(4), 507(18), 551(1), 575(0), 616(38), 621(7), 634(78), 640(72), 672(182), 678(23), 712(23), 715(1), 2027(172), 2029(30), 2040(469), 2050(800), 2063(1868), 2076(1022), 2079(951), 2102(1715), 2146(219) | 25(0), 32(0), 33(0), 46(0), 46(0), 57(0), 60(1), 66(0), 67(0), 77(0), 79(0), 79(0), 88(0), 93(0), 94(0), 101(0), 108(0), 110(0), 114(0), 144(0), 186(0), 234(1), 244(2), 272(1), 408(0), 412(0), 419(2), 426(0), 427(2), 429(0), 443(2), 450(1), 463(2), 469(0), 477(17), 488(6), 489(14), 492(1), 502(4), 517(8), 538(3), 540(1), 565(0), 616(32), 623(9), 637(71), 640(69), 674(147), 684(29), 691(9), 695(2), 1943(332), 1946(164), 1968(1), 1971(56), 1986(1359), 1986(2176), 1992(284), 2016(1423), 2062(238) |

Table S41. Harmonic vibrational frequencies( $\text{cm}^{-1}$ ) and IR intensities (KM/Mole) of  $\text{Mn}_2(\text{CO})_7(\text{PCO})_2$  **27-7S(C<sub>s</sub>)**.

| B3LYP                                                                                                                                                                                                                                                                                                                                                                                                                                                                                                                      | BP86                                                                                                                                                                                                                                                                                                                                                                                                                                                                                                                     |
|----------------------------------------------------------------------------------------------------------------------------------------------------------------------------------------------------------------------------------------------------------------------------------------------------------------------------------------------------------------------------------------------------------------------------------------------------------------------------------------------------------------------------|--------------------------------------------------------------------------------------------------------------------------------------------------------------------------------------------------------------------------------------------------------------------------------------------------------------------------------------------------------------------------------------------------------------------------------------------------------------------------------------------------------------------------|
| 34(0), 47(0), 48(0), 55(0), 60(0), 70(0), 73(1), 76(0), 81(0), 83(0), 93(0), 93(0), 96(0), 104(0), 105(0), 108(1), 112(0), 118(0), 132(0), 137(0), 176(0), 199(0), 256(1), 310(2), 397(3), 406(0), 410(1), 412(0), 415(0), 418(3), 447(0), 459(0), 462(12), 469(13), 477(5), 479(7), 486(27), 487(1), 494(0), 497(47), 503(11), 551(1), 577(0), 598(9), 624(25), 632(104), 640(68), 649(81), 668(133), 671(29), 675(2), 2020(16), 2033(701), 2034(718), 2039(733), 2068(931), 2080(278), 2085(1949), 2096(1683), 2150(161) | 36(0), 45(0), 46(0), 51(0), 55(0), 64(0), 68(1), 71(0), 78(0), 82(0), 91(0), 94(0), 95(0), 102(0), 104(0), 108(1), 109(0), 118(0), 126(1), 155(0), 194(1), 212(6), 285(1), 328(0), 409(0), 415(0), 416(1), 422(0), 423(1), 433(0), 438(1), 439(3), 444(2), 465(1), 466(0), 481(1), 487(14), 490(5), 491(1), 518(43), 527(7), 536(1), 561(0), 602(8), 607(30), 629(37), 635(108), 643(35), 644(11), 656(98), 668(89), 1930(310), 1946(360), 1959(283), 1963(426), 1987(949), 1990(1270), 1996(714), 2009(1614), 2063(194) |

Table S42. Harmonic vibrational frequencies( $\text{cm}^{-1}$ ) and IR intensities (KM/Mole) of  $\text{Mn}_2(\text{CO})_7(\text{PCO})_2$  **27-8S** ( $\text{C}_s$ ).

| B3LYP                                                                                                                                                                                                                                                                                                                                                                                                                                                                                                                     | BP86                                                                                                                                                                                                                                                                                                                                                                                                                                                                                                                    |
|---------------------------------------------------------------------------------------------------------------------------------------------------------------------------------------------------------------------------------------------------------------------------------------------------------------------------------------------------------------------------------------------------------------------------------------------------------------------------------------------------------------------------|-------------------------------------------------------------------------------------------------------------------------------------------------------------------------------------------------------------------------------------------------------------------------------------------------------------------------------------------------------------------------------------------------------------------------------------------------------------------------------------------------------------------------|
| 34(0), 46(0), 48(0), 57(0), 64(0), 67(0), 74(0), 76(1), 82(0), 84(0), 90(0), 94(0), 94(0), 104(0), 105(0), 107(1), 113(0), 116(0), 132(0), 137(0), 178(1), 201(0), 256(1), 309(2), 396(2), 404(0), 411(1), 413(0), 415(0), 419(3), 447(0), 460(3), 462(12), 469(11), 477(7), 479(8), 487(26), 487(0), 494(1), 499(40), 503(10), 551(1), 577(0), 599(8), 625(24), 632(106), 640(70), 648(74), 668(136), 671(29), 674(5), 2021(456), 2028(0), 2034(797), 2041(876), 2068(863), 2080(194), 2088(2437), 2095(1433), 2150(143) | 35(0), 43(0), 45(0), 53(0), 58(0), 60(1), 66(0), 70(1), 80(0), 82(0), 89(0), 95(0), 95(0), 103(0), 103(0), 107(1), 108(0), 116(0), 126(1), 157(0), 196(2), 213(6), 285(1), 328(0), 411(1), 414(1), 417(0), 424(0), 426(1), 427(1), 438(1), 441(2), 446(1), 462(0), 467(1), 481(0), 486(14), 491(2), 491(5), 518(43), 527(5), 537(1), 561(0), 602(11), 608(28), 629(41), 636(122), 636(9), 647(20), 655(92), 667(97), 1929(392), 1946(321), 1961(445), 1961(243), 1985(727), 1994(72), 1996(2293), 2007(1468), 2064(185) |

Table S43. Harmonic vibrational frequencies( $\text{cm}^{-1}$ ) and IR intensities (KM/Mole) of  $\text{Mn}_2(\text{CO})_6(\text{PCO})_2$  **26-1S** ( $\text{C}_2$ ).

| B3LYP                                                                                                                                                                                                                                                                                                                                                                                                                                                                       | BP86                                                                                                                                                                                                                                                                                                                                                                                                                                                                 |
|-----------------------------------------------------------------------------------------------------------------------------------------------------------------------------------------------------------------------------------------------------------------------------------------------------------------------------------------------------------------------------------------------------------------------------------------------------------------------------|----------------------------------------------------------------------------------------------------------------------------------------------------------------------------------------------------------------------------------------------------------------------------------------------------------------------------------------------------------------------------------------------------------------------------------------------------------------------|
| 21(1), 32(0), 48(0), 65(0), 71(0), 76(0), 82(0), 100(0), 101(0), 105(0), 110(0), 111(0), 114(0), 119(0), 121(1), 149(1), 165(0), 198(0), 235(1), 279(0), 283(3), 392(9), 397(0), 415(7), 415(1), 422(0), 426(1), 434(0), 437(1), 462(1), 469(9), 490(13), 493(1), 497(5), 505(9), 518(5), 524(26), 579(18), 584(1), 612(3), 623(104), 625(73), 632(6), 638(113), 658(414), 675(41), 2044(25), 2048(130), 2056(980), 2063(1148), 2065(21), 2070(1194), 2085(2873), 2141(407) | 21(0), 26(1), 48(0), 59(0), 65(0), 70(1), 81(0), 96(0), 98(0), 99(0), 105(0), 108(0), 108(0), 114(0), 116(0), 140(1), 175(0), 205(0), 255(3), 287(0), 293(2), 393(0), 395(3), 415(1), 420(0), 432(6), 432(1), 435(2), 437(1), 456(0), 470(2), 498(1), 499(3), 500(0), 503(0), 526(3), 528(8), 561(6), 566(1), 584(1), 615(122), 620(5), 621(16), 635(121), 648(381), 665(28), 1964(20), 1968(247), 1973(1028), 1983(1025), 1988(4), 1994(886), 2015(1979), 2060(323) |



Table S44. Harmonic vibrational frequencies( $\text{cm}^{-1}$ ) and IR intensities (KM/Mole) of  $\text{Mn}_2(\text{CO})_6(\text{PCO})_2$  **26-2S(C<sub>s</sub>)**.

| B3LYP                                                                                                                                                                                                                                                                                                                                                                                                                                                                        | BP86                                                                                                                                                                                                                                                                                                                                                                                                                                                                       |
|------------------------------------------------------------------------------------------------------------------------------------------------------------------------------------------------------------------------------------------------------------------------------------------------------------------------------------------------------------------------------------------------------------------------------------------------------------------------------|----------------------------------------------------------------------------------------------------------------------------------------------------------------------------------------------------------------------------------------------------------------------------------------------------------------------------------------------------------------------------------------------------------------------------------------------------------------------------|
| 26(0), 45(0), 53(0), 58(0), 73(0), 80(0), 89(0), 90(0), 99(0), 104(0), 109(0), 112(0), 119(0), 135(0), 137(1), 159(1), 180(2), 231(0), 241(0), 282(0), 297(1), 399(6), 407(6), 407(0), 412(0), 423(1), 431(1), 439(4), 447(1), 449(0), 470(13), 472(5), 480(9), 483(17), 495(14), 509(38), 528(4), 579(0), 580(21), 586(1), 619(83), 626(3), 632(103), 637(129), 660(325), 676(45), 1975(389), 2044(513), 2062(336), 2074(1607), 2082(357), 2091(483), 2100(2218), 2148(446) | 22(0), 43(0), 48(0), 52(0), 71(0), 76(0), 84(0), 88(0), 96(1), 101(0), 106(0), 107(1), 115(0), 131(0), 131(0), 147(3), 182(1), 227(0), 255(1), 293(0), 298(1), 399(16), 406(0), 410(0), 421(3), 424(0), 426(1), 438(1), 443(1), 455(1), 485(1), 492(2), 494(0), 496(11), 502(4), 511(4), 519(24), 557(12), 561(0), 565(0), 615(8), 622(9), 628(166), 632(113), 650(338), 667(15), 1918(280), 1967(101), 1981(194), 1983(1738), 1992(523), 2003(297), 2023(1888), 2063(322) |

Table S45. Harmonic vibrational frequencies( $\text{cm}^{-1}$ ) and IR intensities (KM/Mole) of  $\text{Mn}_2(\text{CO})_6(\text{PCO})_2$  **26-3S(C<sub>s</sub>)**.

| B3LYP                                                                                                                                                                                                                                                                                                                                                                                                                                                                       | BP86                                                                                                                                                                                                                                                                                                                                                                                                                                                                  |
|-----------------------------------------------------------------------------------------------------------------------------------------------------------------------------------------------------------------------------------------------------------------------------------------------------------------------------------------------------------------------------------------------------------------------------------------------------------------------------|-----------------------------------------------------------------------------------------------------------------------------------------------------------------------------------------------------------------------------------------------------------------------------------------------------------------------------------------------------------------------------------------------------------------------------------------------------------------------|
| 26(0), 30(0), 43(0), 43(0), 70(0), 71(0), 78(0), 78(0), 84(0), 90(0), 90(0), 100(0), 105(1), 109(0), 112(0), 113(1), 119(0), 152(0), 187(0), 203(37), 326(16), 389(14), 391(0), 393(3), 401(1), 415(1), 419(17), 420(2), 423(4), 458(0), 462(2), 463(0), 468(59), 476(0), 477(19), 537(7), 540(1), 573(1), 575(3), 599(8), 625(0), 627(20), 631(129), 633(112), 670(355), 676(11), 2054(240), 2057(1765), 2062(228), 2075(823), 2079(166), 2086(2339), 2113(2165), 2151(19) | 21(0), 29(0), 41(0), 46(0), 64(0), 72(0), 74(0), 75(0), 80(0), 87(0), 87(0), 96(1), 101(1), 104(0), 109(0), 112(0), 142(0), 158(0), 198(0), 200(9), 352(0), 391(0), 401(5), 416(10), 418(2), 419(1), 420(4), 423(0), 428(1), 474(2), 476(1), 481(2), 486(40), 489(0), 491(8), 522(8), 527(3), 559(1), 561(3), 580(4), 618(8), 625(123), 631(14), 642(108), 670(298), 675(12), 1969(372), 1972(33), 1973(1382), 1990(405), 1991(2109), 1994(225), 2034(1941), 2065(26) |

Table S46. Harmonic vibrational frequencies( $\text{cm}^{-1}$ ) and IR intensities (KM/Mole) of  $\text{Mn}_2(\text{CO})_6(\text{PCO})_2$  **26-1T**( $\text{C}_{2v}$ ).

| B3LYP                                                                                                                                                                                                                                                                                                                                                                                                                                                                  | BP86                                                                                                                                                                                                                                                                                                                                                                                                                                                               |
|------------------------------------------------------------------------------------------------------------------------------------------------------------------------------------------------------------------------------------------------------------------------------------------------------------------------------------------------------------------------------------------------------------------------------------------------------------------------|--------------------------------------------------------------------------------------------------------------------------------------------------------------------------------------------------------------------------------------------------------------------------------------------------------------------------------------------------------------------------------------------------------------------------------------------------------------------|
| 6(0), 32(0), 43(0), 50(0), 51(0), 60(1), 72(0), 74(0), 87(0), 90(0), 91(0), 98(1), 101(0), 104(0), 110(0), 119(1), 155(0), 170(0), 209(0), 253(0), 298(5), 384(0), 387(45), 389(6), 404(0), 408(0), 411(0), 415(2), 417(10), 425(0), 438(21), 451(0), 467(0), 468(24), 476(0), 493(48), 507(1), 528(2), 566(0), 568(0), 608(19), 613(121), 617(0), 619(131), 654(407), 664(23), 2058(0), 2059(1963), 2062(283), 2078(988), 2083(109), 2089(2289), 2105(2328), 2150(34) | 7(0), 14(0), 39(0), 48(0), 49(0), 54(1), 69(0), 72(0), 81(0), 88(0), 88(0), 91(0), 98(0), 100(0), 107(0), 112(0), 148(0), 167(0), 208(0), 258(0), 319(8), 388(0), 403(1), 407(1), 414(2), 416(0), 417(2), 418(17), 424(2), 428(0), 451(4), 467(1), 480(0), 482(9), 490(1), 493(0), 500(28), 519(2), 550(0), 552(0), 598(17), 611(123), 614(107), 621(0), 650(354), 658(25), 1973(0), 1974(1755), 1977(160), 1992(427), 1994(1194), 2000(896), 2025(2229), 2064(42) |

Table S47. Harmonic vibrational frequencies( $\text{cm}^{-1}$ ) and IR intensities (KM/Mole) of  $\text{Mn}_2(\text{CO})_6(\text{PCO})_2$  **26-4S**( $\text{C}_2$ ).

| B3LYP                                                                                                                                                                                                                                                                                                                                                                                                                                                             | BP86                                                                                                                                                                                                                                                                                                                                                                                                                                                         |
|-------------------------------------------------------------------------------------------------------------------------------------------------------------------------------------------------------------------------------------------------------------------------------------------------------------------------------------------------------------------------------------------------------------------------------------------------------------------|--------------------------------------------------------------------------------------------------------------------------------------------------------------------------------------------------------------------------------------------------------------------------------------------------------------------------------------------------------------------------------------------------------------------------------------------------------------|
| -6(0), 11(0), 18(0), 26(0), 48(0), 66(0), 70(0), 74(0), 76(0), 78(0), 91(0), 91(0), 101(1), 104(0), 109(2), 123(0), 148(0), 158(0), 185(0), 250(0), 334(70), 378(0), 392(0), 406(13), 406(0), 409(1), 415(0), 421(6), 422(0), 445(1), 454(0), 476(20), 476(0), 484(0), 485(55), 523(10), 523(0), 572(0), 573(0), 623(0), 625(166), 626(166), 631(0), 645(0), 666(544), 680(0), 2058(0), 2060(2125), 2073(0), 2074(1420), 2077(0), 2079(2763), 2110(3671), 2146(0) | 0(0), 14(0), 16(0), 23(0), 48(0), 62(0), 65(0), 71(0), 74(0), 74(0), 88(0), 88(0), 97(0), 100(0), 104(1), 115(0), 137(0), 156(0), 182(0), 270(0), 353(10), 379(0), 392(0), 401(1), 408(0), 421(4), 425(0), 430(6), 431(0), 446(11), 464(0), 487(6), 489(0), 497(0), 498(26), 511(0), 513(1), 556(0), 557(0), 603(0), 618(151), 619(0), 630(142), 634(0), 662(450), 669(0), 1973(0), 1974(1917), 1983(0), 1989(2335), 1990(889), 1992(0), 2033(2879), 2061(0) |

Table S48. Harmonic vibrational frequencies( $\text{cm}^{-1}$ ) and IR intensities (KM/Mole) of  $\text{Mn}_2(\text{CO})_6(\text{PCO})_2$  **26-2T(C<sub>2</sub>)**.

| B3LYP                                                                                                                                                                                                                                                                                                                                                                                                                                                                        | BP86                                                                                                                                                                                                                                                                                                                                                                                                                                                                    |
|------------------------------------------------------------------------------------------------------------------------------------------------------------------------------------------------------------------------------------------------------------------------------------------------------------------------------------------------------------------------------------------------------------------------------------------------------------------------------|-------------------------------------------------------------------------------------------------------------------------------------------------------------------------------------------------------------------------------------------------------------------------------------------------------------------------------------------------------------------------------------------------------------------------------------------------------------------------|
| 27(0), 29(0), 37(0), 52(1), 65(0), 77(0), 77(0), 83(0), 84(0), 92(2), 98(1), 99(2), 107(0), 109(2), 111(1), 117(0), 133(0), 173(0), 205(16), 222(0), 254(12), 371(1), 371(7), 390(0), 391(17), 396(7), 396(1), 408(7), 410(7), 419(53), 431(1), 456(11), 457(0), 463(21), 470(41), 501(2), 501(13), 555(2), 559(5), 605(31), 607(45), 607(15), 621(110), 622(18), 634(161), 642(43), 2048(569), 2054(40), 2057(1699), 2064(0), 2064(1495), 2071(2118), 2106(1712), 2139(112) | 28(0), 28(0), 36(0), 54(0), 62(0), 74(0), 77(0), 80(0), 81(0), 89(1), 95(0), 97(1), 102(0), 106(0), 109(2), 112(0), 131(0), 174(0), 207(11), 231(0), 267(7), 374(0), 375(3), 386(0), 391(0), 412(1), 415(1), 420(2), 420(8), 445(36), 457(0), 469(1), 470(1), 475(12), 478(21), 499(1), 499(7), 542(1), 546(5), 582(2), 603(24), 604(46), 621(39), 623(92), 632(154), 640(27), 1959(352), 1971(1307), 1972(215), 1977(64), 1982(1594), 1982(1284), 2019(1650), 2053(79) |

Table S49. Harmonic vibrational frequencies( $\text{cm}^{-1}$ ) and IR intensities (KM/Mole) of  $\text{Mn}_2(\text{CO})_6(\text{PCO})_2$  **26-5S(C<sub>2</sub>)**.

| B3LYP                                                                                                                                                                                                                                                                                                                                                                                                                                                                          | BP86                                                                                                                                                                                                                                                                                                                                                                                                                                                                      |
|--------------------------------------------------------------------------------------------------------------------------------------------------------------------------------------------------------------------------------------------------------------------------------------------------------------------------------------------------------------------------------------------------------------------------------------------------------------------------------|---------------------------------------------------------------------------------------------------------------------------------------------------------------------------------------------------------------------------------------------------------------------------------------------------------------------------------------------------------------------------------------------------------------------------------------------------------------------------|
| 21(0), 49(2), 53(0), 60(0), 66(1), 80(0), 89(0), 91(0), 96(0), 98(0), 102(0), 111(4), 114(0), 115(1), 120(2), 168(0), 184(4), 198(9), 230(0), 233(18), 319(8), 325(0), 395(4), 405(14), 410(29), 417(0), 417(5), 422(2), 447(0), 463(11), 469(26), 475(24), 477(0), 483(6), 507(13), 520(6), 539(26), 551(1), 561(4), 568(1), 615(22), 619(19), 632(71), 639(69), 646(82), 664(159), 1874(1173), 1894(157), 2068(253), 2071(693), 2083(805), 2084(1690), 2095(1604), 2142(183) | 26(0), 49(0), 50(0), 63(0), 72(0), 80(0), 85(0), 87(0), 93(0), 99(0), 100(0), 112(0), 112(0), 115(0), 126(0), 174(0), 211(4), 221(0), 267(2), 295(6), 333(4), 350(0), 397(17), 411(6), 419(6), 421(1), 423(0), 427(2), 439(1), 457(0), 468(0), 481(15), 482(12), 488(6), 489(0), 515(8), 531(1), 534(1), 550(1), 562(21), 566(14), 594(20), 630(65), 632(61), 642(161), 658(101), 1803(902), 1824(128), 1985(68), 1992(567), 1994(1665), 1999(594), 2019(1376), 2059(185) |

Table S50. Harmonic vibrational frequencies( $\text{cm}^{-1}$ ) and IR intensities (KM/Mole) of  $\text{Mn}_2(\text{CO})_6(\text{PCO})_2$  **26-6S(C<sub>1</sub>)**.

| B3LYP                                                                                                                                                                                                                                                                                                                                                                                                                                                                     | BP86                                                                                                                                                                                                                                                                                                                                                                                                                                                                |
|---------------------------------------------------------------------------------------------------------------------------------------------------------------------------------------------------------------------------------------------------------------------------------------------------------------------------------------------------------------------------------------------------------------------------------------------------------------------------|---------------------------------------------------------------------------------------------------------------------------------------------------------------------------------------------------------------------------------------------------------------------------------------------------------------------------------------------------------------------------------------------------------------------------------------------------------------------|
| 18(0), 44(1), 51(0), 59(1), 62(1), 69(0), 78(0), 83(0), 88(0), 91(0), 94(0), 100(0), 106(0), 109(0), 120(1), 125(1), 151(0), 179(7), 204(8), 215(0), 291(4), 326(8), 398(4), 408(5), 414(7), 416(4), 418(16), 429(0), 444(0), 464(20), 468(19), 475(3), 478(6), 486(12), 493(5), 500(15), 535(22), 546(2), 553(9), 570(0), 616(28), 629(78), 637(77), 658(29), 663(168), 686(7), 1883(608), 2030(152), 2038(940), 2069(662), 2074(1263), 2080(448), 2084(2259), 2141(286) | 15(0), 31(1), 47(0), 56(0), 62(0), 71(0), 75(0), 83(1), 87(0), 92(0), 94(0), 99(0), 101(0), 107(0), 119(0), 127(0), 166(0), 193(8), 233(1), 253(1), 310(3), 328(5), 395(0), 404(6), 414(1), 418(1), 423(0), 427(1), 434(4), 439(1), 459(4), 480(6), 482(16), 492(2), 493(2), 505(7), 517(3), 531(6), 549(9), 553(9), 595(36), 624(72), 628(92), 641(66), 651(7), 656(119), 1826(564), 1951(296), 1961(301), 1988(945), 1989(1094), 1996(218), 2001(1892), 2056(280) |

Table S51. Harmonic vibrational frequencies( $\text{cm}^{-1}$ ) and IR intensities (KM/Mole) of  $\text{Mn}_2(\text{CO})_6(\text{PCO})_2$  **26-7S(C<sub>s</sub>)**.

| B3LYP                                                                                                                                                                                                                                                                                                                                                                                                                                                               | BP86                                                                                                                                                                                                                                                                                                                                                                                                                                                               |
|---------------------------------------------------------------------------------------------------------------------------------------------------------------------------------------------------------------------------------------------------------------------------------------------------------------------------------------------------------------------------------------------------------------------------------------------------------------------|--------------------------------------------------------------------------------------------------------------------------------------------------------------------------------------------------------------------------------------------------------------------------------------------------------------------------------------------------------------------------------------------------------------------------------------------------------------------|
| 24(0), 33(0), 34(0), 55(0), 59(0), 61(1), 65(0), 75(0), 81(0), 86(0), 90(0), 100(1), 101(1), 107(0), 110(0), 111(0), 121(0), 149(0), 210(0), 221(9), 245(7), 260(2), 402(2), 406(0), 423(3), 428(0), 451(0), 453(0), 470(2), 472(1), 475(6), 487(0), 489(0), 502(5), 507(21), 510(14), 513(17), 514(15), 604(35), 613(28), 617(9), 619(10), 669(81), 681(52), 683(33), 690(2), 2026(268), 2027(0), 2038(503), 2044(8), 2050(508), 2071(3099), 2087(1998), 2126(304) | 23(0), 33(0), 37(0), 52(0), 54(0), 57(1), 61(1), 74(0), 80(0), 85(0), 91(0), 98(0), 101(0), 103(0), 107(0), 112(0), 132(0), 147(0), 219(0), 238(4), 253(1), 279(1), 411(1), 411(1), 419(1), 433(0), 442(3), 448(0), 459(3), 459(0), 468(5), 473(3), 498(7), 507(2), 516(14), 524(3), 532(4), 534(3), 597(30), 612(27), 615(6), 619(16), 663(58), 664(14), 672(14), 683(45), 1935(211), 1943(126), 1953(836), 1954(27), 1980(13), 1999(1752), 2000(2342), 2039(219) |

Table S52. Harmonic vibrational frequencies( $\text{cm}^{-1}$ ) and IR intensities (KM/Mole) of  $\text{Mn}_2(\text{CO})_5(\text{PCO})_2$  **25-1S(C<sub>s</sub>)**.

| B3LYP                                                                                                                                                                                                                                                                                                                                                                                                                      | BP86                                                                                                                                                                                                                                                                                                                                                                                                                   |
|----------------------------------------------------------------------------------------------------------------------------------------------------------------------------------------------------------------------------------------------------------------------------------------------------------------------------------------------------------------------------------------------------------------------------|------------------------------------------------------------------------------------------------------------------------------------------------------------------------------------------------------------------------------------------------------------------------------------------------------------------------------------------------------------------------------------------------------------------------|
| 31(0), 51(0), 59(0), 72(0), 83(0), 84(0), 87(0), 100(0), 101(0), 103(0), 115(0), 119(0), 125(0), 133(0), 157(1), 197(1), 254(0), 286(15), 390(5), 398(5), 401(0), 406(0), 410(12), 422(0), 424(4), 439(2), 455(6), 460(53), 473(1), 480(20), 487(1), 495(2), 534(12), 547(0), 558(0), 568(14), 593(87), 613(61), 629(227), 634(67), 660(85), 2055(443), 2057(337), 2073(670), 2078(1971), 2084(382), 2088(2017), 2140(145) | 25(0), 50(0), 53(0), 68(0), 78(0), 79(0), 84(0), 96(0), 97(0), 99(0), 109(0), 114(0), 118(0), 126(0), 157(0), 196(0), 259(0), 286(19), 389(2), 392(0), 403(0), 410(4), 417(4), 419(0), 421(0), 432(2), 448(2), 471(26), 474(2), 480(0), 489(13), 499(2), 527(2), 530(0), 539(0), 560(15), 589(118), 604(61), 623(170), 624(61), 651(73), 1971(184), 1971(393), 1992(1678), 1994(538), 2000(297), 2004(1858), 2055(153) |

Table S53. Harmonic vibrational frequencies( $\text{cm}^{-1}$ ) and IR intensities (KM/Mole) of  $\text{Mn}_2(\text{CO})_5(\text{PCO})_2$  **25-2S(C<sub>s</sub>)**.

| B3LYP                                                                                                                                                                                                                                                                                                                                                                                                                | BP86                                                                                                                                                                                                                                                                                                                                                                                                                |
|----------------------------------------------------------------------------------------------------------------------------------------------------------------------------------------------------------------------------------------------------------------------------------------------------------------------------------------------------------------------------------------------------------------------|---------------------------------------------------------------------------------------------------------------------------------------------------------------------------------------------------------------------------------------------------------------------------------------------------------------------------------------------------------------------------------------------------------------------|
| 9(0), 29(0), 43(1), 57(1), 75(0), 79(0), 90(0), 91(0), 99(0), 102(0), 107(1), 122(1), 132(2), 135(1), 152(0), 223(3), 225(0), 284(0), 288(1), 392(1), 398(3), 402(0), 412(3), 412(1), 424(1), 446(1), 457(8), 466(5), 474(21), 484(11), 500(34), 500(26), 524(2), 538(2), 573(7), 573(0), 599(67), 609(1), 627(77), 645(78), 664(166), 1983(343), 2029(727), 2066(1516), 2073(1343), 2084(938), 2093(393), 2145(784) | 13(0), 26(0), 41(1), 55(1), 73(0), 74(0), 87(0), 89(0), 93(0), 95(0), 103(0), 116(0), 127(0), 132(2), 158(1), 240(0), 240(0), 289(0), 292(0), 394(1), 400(0), 411(0), 414(0), 422(2), 429(2), 444(0), 461(3), 471(3), 489(6), 491(12), 493(9), 502(12), 508(1), 521(3), 559(0), 574(11), 605(66), 605(0), 621(74), 636(79), 662(146), 1921(245), 1943(551), 1976(1225), 1981(617), 1992(1489), 2002(289), 2056(639) |

Table S54. Harmonic vibrational frequencies( $\text{cm}^{-1}$ ) and IR intensities (KM/Mole) of  $\text{Mn}_2(\text{CO})_5(\text{PCO})_2$  **25-1T(C<sub>1</sub>)**.

| B3LYP                                                                                                                                                                                                                                                                                                                                                                                                                      | BP86                                                                                                                                                                                                                                                                                                                                                                                                                   |
|----------------------------------------------------------------------------------------------------------------------------------------------------------------------------------------------------------------------------------------------------------------------------------------------------------------------------------------------------------------------------------------------------------------------------|------------------------------------------------------------------------------------------------------------------------------------------------------------------------------------------------------------------------------------------------------------------------------------------------------------------------------------------------------------------------------------------------------------------------|
| 24(0), 39(0), 47(0), 61(0), 68(1), 78(0), 84(0), 89(0), 91(0), 100(0), 102(0), 112(0), 128(0), 140(1), 156(1), 196(1), 215(0), 272(3), 276(2), 338(2), 350(15), 374(11), 388(8), 406(3), 407(3), 423(1), 426(1), 455(9), 465(10), 469(11), 475(10), 495(11), 505(22), 513(44), 521(9), 535(17), 575(5), 599(7), 608(75), 629(66), 662(204), 1988(404), 2038(345), 2063(1381), 2066(1523), 2078(1674), 2079(588), 2135(617) | 20(0), 30(0), 36(0), 55(0), 65(0), 73(0), 78(0), 85(0), 88(0), 99(0), 103(0), 109(0), 123(0), 133(0), 156(0), 201(0), 237(1), 277(1), 286(0), 359(0), 364(1), 396(1), 402(1), 408(0), 422(2), 425(14), 430(1), 470(5), 479(3), 482(1), 485(2), 504(3), 505(4), 543(24), 555(11), 556(17), 558(11), 587(28), 602(72), 615(60), 653(170), 1930(272), 1949(433), 1975(1196), 1976(1275), 1988(1264), 1995(249), 2049(630) |

Table S55. Harmonic vibrational frequencies( $\text{cm}^{-1}$ ) and IR intensities (KM/Mole) of  $\text{Mn}_2(\text{CO})_5(\text{PCO})_2$  **25-3S(C<sub>s</sub>)**.

| B3LYP                                                                                                                                                                                                                                                                                                                                                                                                              | BP86                                                                                                                                                                                                                                                                                                                                                                                                           |
|--------------------------------------------------------------------------------------------------------------------------------------------------------------------------------------------------------------------------------------------------------------------------------------------------------------------------------------------------------------------------------------------------------------------|----------------------------------------------------------------------------------------------------------------------------------------------------------------------------------------------------------------------------------------------------------------------------------------------------------------------------------------------------------------------------------------------------------------|
| 19(0), 22(0), 61(1), 66(0), 73(0), 73(0), 80(0), 94(0), 98(0), 101(0), 109(0), 110(0), 117(0), 141(0), 147(0), 190(0), 255(1), 292(1), 296(3), 396(0), 402(1), 406(3), 438(6), 446(0), 448(1), 454(6), 456(4), 470(0), 471(2), 495(3), 522(53), 523(1), 531(17), 537(8), 581(15), 602(65), 608(2), 616(90), 633(7), 643(233), 660(1), 2035(178), 2046(1), 2051(103), 2056(1266), 2071(2143), 2083(2541), 2125(102) | 8(0), 19(0), 54(1), 62(0), 68(0), 70(0), 77(0), 92(0), 95(0), 97(0), 104(0), 105(0), 114(0), 133(0), 140(1), 193(0), 258(3), 308(0), 309(0), 389(0), 397(1), 412(0), 435(1), 446(0), 448(1), 453(1), 455(0), 458(6), 465(5), 481(0), 531(1), 533(10), 536(0), 537(14), 581(22), 593(66), 603(8), 614(77), 630(5), 633(181), 654(1), 1952(473), 1957(0), 1965(37), 1968(1058), 1992(1429), 2000(2055), 2035(90) |

Table S56. Harmonic vibrational frequencies( $\text{cm}^{-1}$ ) and IR intensities (KM/Mole) of  $\text{Mn}(\text{CO})_5(\text{PCO})$  **15-1S(C<sub>s</sub>)**.

| B3LYP                                                                                                                                                                                                                                                                                                               | BP86                                                                                                                                                                                                                                                                                                              |
|---------------------------------------------------------------------------------------------------------------------------------------------------------------------------------------------------------------------------------------------------------------------------------------------------------------------|-------------------------------------------------------------------------------------------------------------------------------------------------------------------------------------------------------------------------------------------------------------------------------------------------------------------|
| 10(0), 65(0), 71(0), 73(0), 91(0), 95(0), 97(0), 100(0), 114(1), 114(1), 122(0), 238(0), 365(0), 389(2), 400(0), 405(1), 416(1), 441(22), 452(24), 456(0), 469(3), 499(6), 510(4), 546(0), 559(0), 564(0), 661(126), 662(125), 671(233), 754(11), 1992(842), 2079(762), 2098(1434), 2101(1334), 2114(22), 2172(150) | 16(0), 58(0), 64(0), 68(0), 86(1), 92(0), 94(0), 94(0), 109(1), 110(1), 118(0), 243(0), 371(0), 396(0), 414(0), 419(0), 427(0), 433(0), 459(13), 470(10), 480(8), 487(9), 489(1), 531(0), 548(0), 555(0), 664(119), 664(115), 675(212), 736(6), 1936(589), 1994(670), 2007(1352), 2008(1217), 2028(10), 2089(115) |

Table S57. Harmonic vibrational frequencies( $\text{cm}^{-1}$ ) and IR intensities (KM/Mole) of  $\text{Mn}(\text{CO})_5(\text{PCO})$  **15-2S(C<sub>s</sub>)**.

| B3LYP                                                                                                                                                                                                                                                                                                              | BP86                                                                                                                                                                                                                                                                                                             |
|--------------------------------------------------------------------------------------------------------------------------------------------------------------------------------------------------------------------------------------------------------------------------------------------------------------------|------------------------------------------------------------------------------------------------------------------------------------------------------------------------------------------------------------------------------------------------------------------------------------------------------------------|
| 6(0), 54(1), 69(0), 78(0), 86(0), 92(0), 93(0), 95(0), 106(1), 134(2), 137(2), 310(20), 347(0), 366(2), 374(0), 389(5), 403(34), 405(29), 409(1), 447(2), 449(0), 508(7), 533(1), 541(0), 544(1), 552(5), 646(109), 652(101), 655(152), 870(21), 1708(576), 2083(798), 2127(1266), 2128(1165), 2147(64), 2195(141) | 14(0), 52(0), 62(0), 75(0), 81(0), 88(0), 91(0), 91(0), 99(1), 127(1), 128(1), 264(3), 357(0), 395(1), 402(0), 404(0), 409(2), 417(6), 436(20), 440(21), 472(1), 494(25), 512(1), 533(0), 535(0), 542(3), 652(106), 658(103), 663(192), 832(1), 1641(72), 1993(634), 2022(1238), 2024(1135), 2047(24), 2097(312) |

Table S58. Harmonic vibrational frequencies( $\text{cm}^{-1}$ ) and IR intensities (KM/Mole) of  $\text{Mn}(\text{CO})_4(\text{PCO})$  **14-1S**( $\text{C}_s$ ).

| B3LYP                                                                                                                                                                                                                                                              | BP86                                                                                                                                                                                                                                                          |
|--------------------------------------------------------------------------------------------------------------------------------------------------------------------------------------------------------------------------------------------------------------------|---------------------------------------------------------------------------------------------------------------------------------------------------------------------------------------------------------------------------------------------------------------|
| 28(0), 58(0), 75(0), 89(0), 92(0), 93(1), 103(0), 115(0), 119(0), 287(22), 378(0), 394(1), 401(2), 420(6), 459(0), 475(0), 479(10), 482(30), 512(12), 554(5), 568(0), 615(52), 633(78), 681(100), 703(28), 2016(890), 2059(1033), 2074(520), 2079(1710), 2146(215) | 29(0), 58(0), 70(0), 86(0), 86(0), 89(0), 100(0), 109(0), 114(0), 300(9), 379(0), 398(0), 425(1), 430(2), 456(0), 479(1), 482(2), 497(3), 504(31), 546(5), 558(0), 625(46), 630(75), 684(89), 686(5), 1951(386), 1969(910), 1981(1071), 1988(1119), 2058(163) |

Table S59. Harmonic vibrational frequencies( $\text{cm}^{-1}$ ) and IR intensities (KM/Mole) of  $\text{Mn}(\text{CO})_4(\text{PCO})$  **14-2S**( $\text{C}_s$ ).

| B3LYP                                                                                                                                                                                                                                                            | BP86                                                                                                                                                                                                                                                           |
|------------------------------------------------------------------------------------------------------------------------------------------------------------------------------------------------------------------------------------------------------------------|----------------------------------------------------------------------------------------------------------------------------------------------------------------------------------------------------------------------------------------------------------------|
| 21(1), 50(0), 77(0), 79(0), 88(0), 96(0), 105(0), 121(4), 157(1), 334(39), 354(0), 366(5), 389(0), 394(40), 419(5), 459(2), 465(3), 470(5), 511(16), 547(0), 565(0), 602(52), 628(55), 677(71), 904(47), 1683(168), 2059(1043), 2084(652), 2114(1303), 2166(379) | 23(0), 46(0), 73(0), 75(0), 87(0), 94(1), 103(0), 125(2), 156(0), 321(13), 361(0), 393(0), 403(5), 416(1), 436(30), 446(2), 473(6), 489(2), 498(20), 540(3), 558(0), 624(43), 627(52), 685(70), 874(21), 1651(35), 1968(919), 1989(372), 1999(1280), 2068(429) |

Table S60. Harmonic vibrational frequencies( $\text{cm}^{-1}$ ) and IR intensities (KM/Mole) of  $\text{Mn}(\text{CO})_3(\text{PCO})$  **13-1S**( $\text{C}_s$ ).

| B3LYP                                                                                                                                                                                                         | BP86                                                                                                                                                                                                        |
|---------------------------------------------------------------------------------------------------------------------------------------------------------------------------------------------------------------|-------------------------------------------------------------------------------------------------------------------------------------------------------------------------------------------------------------|
| 39(0), 86(0), 86(0), 102(0), 108(0), 112(1), 227(0), 255(9), 387(0), 429(0), 439(2), 442(1), 449(2), 488(24), 523(26), 571(2), 609(21), 615(48), 687(49), 803(0), 1782(318), 2056(857), 2060(1033), 2119(651) | 38(0), 85(0), 85(0), 100(0), 107(0), 107(1), 222(1), 266(2), 395(1), 412(1), 436(0), 451(4), 474(3), 518(11), 533(9), 557(0), 614(21), 624(49), 692(41), 767(1), 1742(266), 1962(907), 1964(715), 2027(492) |

Table S61. Harmonic vibrational frequencies( $\text{cm}^{-1}$ ) and IR intensities (KM/Mole) of  $\text{Mn}(\text{CO})_3(\text{PCO})$  **13-2S**( $\text{C}_{3v}$ ).

| B3LYP                                                                                                                                                                                                             | BP86                                                                                                                                                                                                          |
|-------------------------------------------------------------------------------------------------------------------------------------------------------------------------------------------------------------------|---------------------------------------------------------------------------------------------------------------------------------------------------------------------------------------------------------------|
| 23(0), 23(0), 91(0), 91(0), 102(0), 161(3), 161(3), 324(49), 382(0), 393(0), 393(0), 471(0), 471(0), 480(13), 500(24), 500(24), 623(21), 623(21), 689(26), 971(167), 1708(298), 2053(1037), 2053(1038), 2116(913) | 26(0), 26(0), 91(0), 91(0), 102(0), 162(2), 162(2), 327(21), 394(0), 395(1), 395(1), 469(1), 469(1), 512(31), 524(10), 524(10), 631(19), 631(19), 695(17), 941(97), 1669(69), 1951(885), 1951(885), 2021(675) |

Table S62. Harmonic vibrational frequencies( $\text{cm}^{-1}$ ) and IR intensities (KM/Mole) of  $\text{Mn}(\text{CO})_3(\text{PCO})$  **13-1T(C<sub>s</sub>)**.

| B3LYP                                                                                                                                                                                                       | BP86                                                                                                                                                                                                       |
|-------------------------------------------------------------------------------------------------------------------------------------------------------------------------------------------------------------|------------------------------------------------------------------------------------------------------------------------------------------------------------------------------------------------------------|
| 36(0), 50(0), 56(1), 92(0), 97(2), 104(0), 116(0), 265(20), 317(1), 341(0), 395(2), 399(5), 413(2), 467(58), 473(0), 504(6), 534(41), 562(7), 608(76), 724(28), 2000(607), 2045(2318), 2081(571), 2141(433) | 34(0), 49(0), 55(1), 83(0), 93(2), 95(0), 110(0), 281(13), 329(1), 336(0), 401(1), 423(3), 438(4), 446(0), 484(27), 488(4), 542(55), 563(4), 611(46), 698(20), 1934(537), 1958(1900), 1982(878), 2039(250) |



### **Complete Gaussian 09 reference (Reference 21)**

Gaussian 09, Revision B.01, Frisch, M. J.; Trucks, G. W.; Schlegel, H. B.; Scuseria, G. E.; Robb, M. A.; Cheeseman, J. R.; Scalmani, G.; Barone, V.; Mennucci, B.; Petersson, G. A.; Nakatsuji, H.; Caricato, M.; Li, X.; Hratchian, H. P.; Izmaylov, A. F.; Bloino, J.; Zheng, G.; Sonnenberg, J. L.; Hada, M.; Ehara, M.; Toyota, K.; Fukuda, R.; Hasegawa, J.; Ishida, M.; Nakajima, T.; Honda, Y.; Kitao, O.; Nakai, H.; Vreven, T.; Montgomery, Jr., J. A.; Peralta, J. E.; Ogliaro, F.; Bearpark, M.; Heyd, J. J.; Brothers, E.; Kudin, K. N.; Staroverov, V. N.; Kobayashi, R.; Normand, J.; Raghavachari, K.; Rendell, A.; Burant, J. C.; Iyengar, S. S.; Tomasi, J.; Cossi, M.; Rega, N.; Millam, J. M.; Klene, M.; Knox, J. E.; Cross, J. B.; Bakken, V.; Adamo, C.; Jaramillo, J.; Gomperts, R.; Stratmann, R. E.; Yazyev, O.; Austin, A. J.; Cammi, R.; Pomelli, C.; Ochterski, J. W.; Martin, R. L.; Morokuma, K.; Zakrzewski, V. G.; Voth, G. A.; Salvador, P.; Dannenberg, J. J.; Dapprich, S.; Daniels, A. D.; Farkas, Ö.; Foresman, J. B.; Ortiz, J. V.; Cioslowski, J.; Fox, D. J. Gaussian, Inc., Wallingford CT, **2009**.
